# Supplementary material for: Proposal for halogen atom transfer mechanism for Ullmann O-arylation of phenols with aryl halides
Source: Royal Society of Chemistry journal article supplement (doi:10.1039/c2dt31500a), 2012-01-01
Supplement: c2dt31500a.pdf [file c2dt31500a.pdf]

## Electronic Supplementary Information

### Proposal for Halogen Atom Transfer Mechanism for Ullmann O-Arylation of Phenols with Aryl Halides

Songlin Zhang\*, Zhenzhong Zhu, and Yuqiang Ding\*

*The Key Laboratory of Food Colloids and Biotechnology, Ministry of Education, School of  
Chemical and Material Engineering, Jiangnan University, Wuxi 214122, Jiangsu Province,  
China*

#### Contents

1. Additional Computational Results -----S2
2. Optimized Cartesian Coordinates from B3LYP/6-31G(d) Calculations -----S4
3. Absolute Electronic Energies, Zero-Point Vibrational Energies, Thermal Corrections to  
Enthalpy and Gibbs Free Energies, and Solvation Energies ----- S25

## 1. Additional Computational Results

### a. Reductive elimination of oxidative addition complex **PDb**

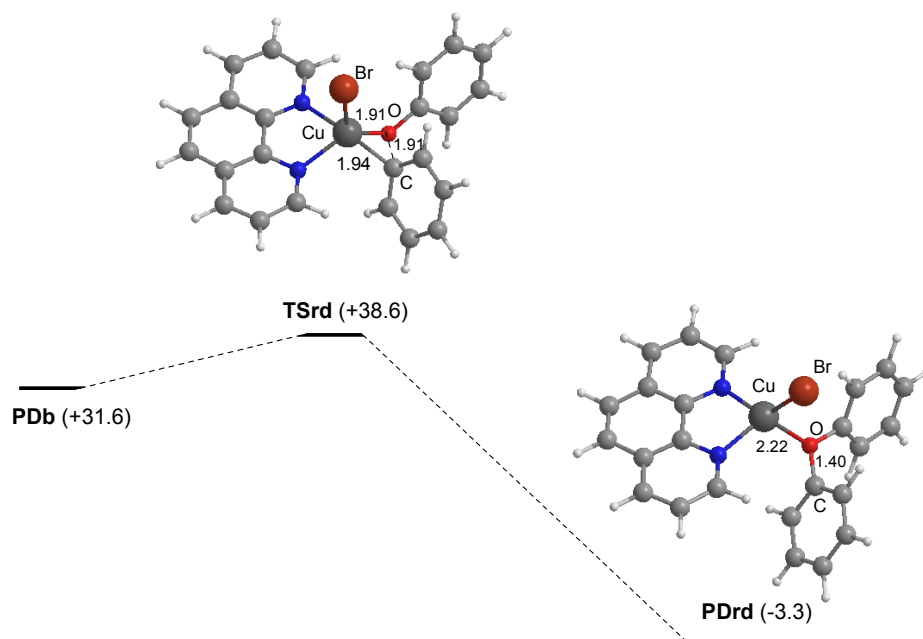

Figure S1. Reaction coordinates of reductive elimination of complex **PDb**.

### b. Oxidative addition of complex **A** with phenyl bromide

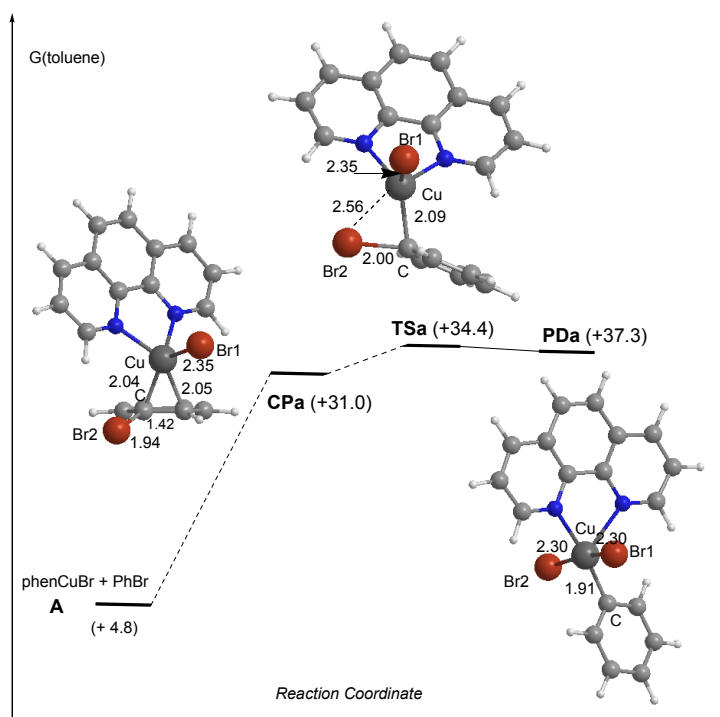

Figure S2. Reaction coordinates of oxidative addition of complex A with phenyl bromide.

c. Oxidative addition of complex E with phenyl bromide

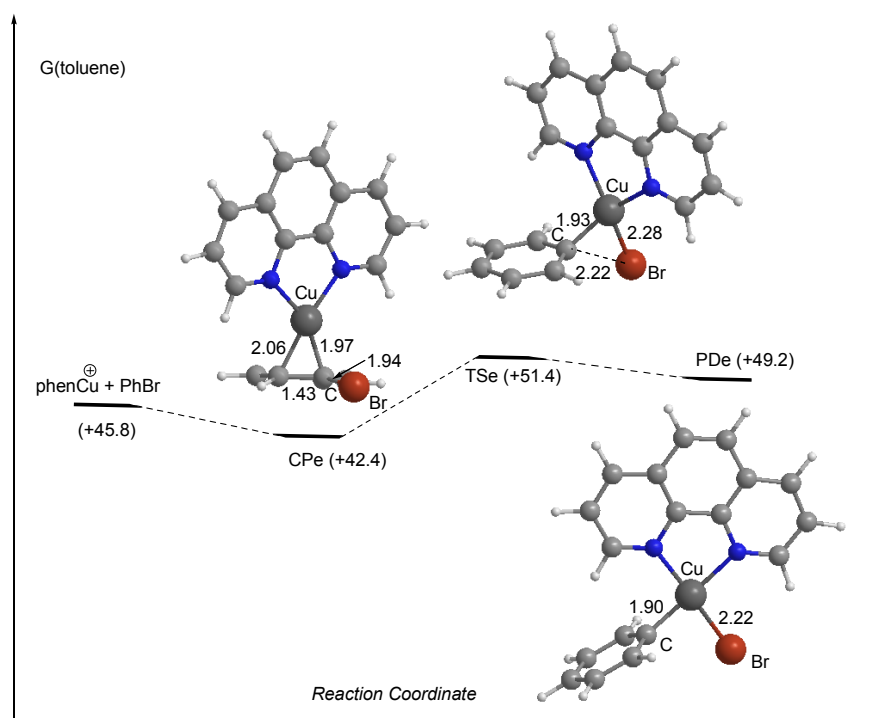

Figure S3. Reaction coordinates of oxidative addition of complex E with phenyl bromide.

## 2. Optimized Cartesian Coordinates from B3LYP/6-31G(d) Calculations

### PhBr

SCF Done: E(RB+HF-LYP) = -2803.35368043 A.U.

| Center Number | Atomic Number | Atomic Type | Coordinates (Angstroms) |           |           |
|---------------|---------------|-------------|-------------------------|-----------|-----------|
|               |               |             | X                       | Y         | Z         |
| 1             | 35            | 0           | -1.810705               | -0.000003 | -0.000017 |
| 2             | 6             | 0           | 0.103827                | 0.000210  | -0.000030 |
| 3             | 6             | 0           | 0.784807                | -1.215747 | -0.000043 |
| 4             | 6             | 0           | 2.180984                | -1.207838 | 0.000095  |
| 5             | 6             | 0           | 2.881291                | -0.000164 | -0.000032 |
| 6             | 6             | 0           | 2.181256                | 1.207696  | -0.000120 |
| 7             | 6             | 0           | 0.785071                | 1.215899  | 0.000149  |
| 8             | 1             | 0           | 0.232807                | -2.149474 | 0.000074  |
| 9             | 1             | 0           | 2.718628                | -2.152104 | 0.000153  |
| 10            | 1             | 0           | 3.967516                | -0.000473 | -0.000054 |
| 11            | 1             | 0           | 2.718886                | 2.151954  | -0.000386 |
| 12            | 1             | 0           | 0.233442                | 2.149881  | 0.000687  |

### PhOH

SCF Done: E(RB+HF-LYP) = -307.464867405 A.U.

| Center Number | Atomic Number | Atomic Type | Coordinates (Angstroms) |           |           |
|---------------|---------------|-------------|-------------------------|-----------|-----------|
|               |               |             | X                       | Y         | Z         |
| 1             | 6             | 0           | 0.263830                | 1.199685  | -0.000001 |
| 2             | 6             | 0           | 0.940934                | -0.024501 | -0.000002 |
| 3             | 6             | 0           | 0.221015                | -1.224128 | 0.000000  |
| 4             | 6             | 0           | -1.171630               | -1.190400 | 0.000001  |
| 5             | 6             | 0           | -1.857308               | 0.027668  | 0.000000  |
| 6             | 6             | 0           | -1.131626               | 1.219386  | 0.000000  |
| 7             | 8             | 0           | 2.307040                | -0.111940 | -0.000003 |
| 8             | 1             | 0           | 0.765962                | -2.162936 | 0.000004  |
| 9             | 1             | 0           | -1.725537               | -2.125600 | 0.000003  |
| 10            | 1             | 0           | -2.943114               | 0.046915  | 0.000002  |
| 11            | 1             | 0           | -1.650029               | 2.174659  | 0.000000  |
| 12            | 1             | 0           | 0.826722                | 2.131893  | 0.000001  |
| 13            | 1             | 0           | 2.678383                | 0.784330  | 0.000032  |

### Ph<sub>2</sub>O

SCF Done: E(RB+HF-LYP) = -538.512821128 A.U.

| Center Number | Atomic Number | Atomic Type | Coordinates (Angstroms) |           |           |
|---------------|---------------|-------------|-------------------------|-----------|-----------|
|               |               |             | X                       | Y         | Z         |
| 1             | 6             | 0           | -2.266139               | -1.070218 | 0.663286  |
| 2             | 6             | 0           | -1.201582               | -0.499251 | -0.037345 |
| 3             | 6             | 0           | -1.390041               | 0.657502  | -0.799801 |
| 4             | 6             | 0           | -2.654753               | 1.245209  | -0.844699 |
| 5             | 6             | 0           | -3.726633               | 0.684369  | -0.147143 |
| 6             | 6             | 0           | -3.526699               | -0.476984 | 0.602304  |
| 7             | 8             | 0           | -0.000011               | -1.180971 | 0.000088  |
| 8             | 6             | 0           | 1.201575                | -0.499304 | 0.037446  |
| 9             | 6             | 0           | 2.266044                | -1.070176 | -0.663403 |
| 10            | 6             | 0           | 3.526607                | -0.476941 | -0.602537 |
| 11            | 6             | 0           | 3.726638                | 0.684326  | 0.147021  |
| 12            | 6             | 0           | 2.654852                | 1.245080  | 0.844789  |
| 13            | 6             | 0           | 1.390141                | 0.657370  | 0.800000  |
| 14            | 1             | 0           | -0.558942               | 1.085621  | -1.350478 |
| 15            | 1             | 0           | -2.801432               | 2.144084  | -1.437762 |
| 16            | 1             | 0           | -4.708556               | 1.146781  | -0.189143 |
| 17            | 1             | 0           | -4.353621               | -0.923556 | 1.147992  |
| 18            | 1             | 0           | -2.089674               | -1.971852 | 1.241313  |
| 19            | 1             | 0           | 0.559107                | 1.085397  | 1.350851  |
| 20            | 1             | 0           | 2.801616                | 2.143885  | 1.437940  |
| 21            | 1             | 0           | 4.708559                | 1.146748  | 0.188942  |
| 22            | 1             | 0           | 4.353456                | -0.923450 | -1.148387 |
| 23            | 1             | 0           | 2.089516                | -1.971771 | -1.241475 |

### phen

SCF Done: E(RB+HF-LYP) = -571.610386722 A.U.

| Center Number | Atomic Number | Atomic Type | Coordinates (Angstroms) |           |          |
|---------------|---------------|-------------|-------------------------|-----------|----------|
|               |               |             | X                       | Y         | Z        |
| 1             | 6             | 0           | -2.179083               | -0.362687 | 0.000000 |
| 2             | 6             | 0           | -1.553016               | -1.570952 | 0.000000 |
| 3             | 6             | 0           | -0.121148               | -1.658607 | 0.000000 |
| 4             | 6             | 0           | 0.671302                | -0.473718 | 0.000000 |
| 5             | 6             | 0           | 0.000000                | 0.821521  | 0.000000 |

|    |   |   |           |           |          |
|----|---|---|-----------|-----------|----------|
| 6  | 6 | 0 | -1.424856 | 0.857505  | 0.000000 |
| 7  | 6 | 0 | 0.554479  | -2.899024 | 0.000000 |
| 8  | 6 | 0 | 1.933280  | -2.920409 | 0.000000 |
| 9  | 6 | 0 | 2.619106  | -1.688314 | 0.000000 |
| 10 | 7 | 0 | 2.023819  | -0.506919 | 0.000000 |
| 11 | 6 | 0 | -2.048786 | 2.124712  | 0.000000 |
| 12 | 6 | 0 | -1.271243 | 3.263448  | 0.000000 |
| 13 | 6 | 0 | 0.130933  | 3.113199  | 0.000000 |
| 14 | 7 | 0 | 0.752815  | 1.945632  | 0.000000 |
| 15 | 1 | 0 | 3.708855  | -1.675690 | 0.000000 |
| 16 | 1 | 0 | 2.486124  | -3.855100 | 0.000000 |
| 17 | 1 | 0 | -0.022223 | -3.821234 | 0.000000 |
| 18 | 1 | 0 | 0.769666  | 3.996243  | 0.000000 |
| 19 | 1 | 0 | -1.716067 | 4.254110  | 0.000000 |
| 20 | 1 | 0 | -3.134810 | 2.185116  | 0.000000 |
| 21 | 1 | 0 | -2.128976 | -2.493351 | 0.000000 |
| 22 | 1 | 0 | -3.264803 | -0.301133 | 0.000000 |

**A**  
 SCF Done: E(RB+HF-LYP) = -4783.71761682 A.U.

| Center Number | Atomic Number | Atomic Type | Coordinates (Angstroms) |           |           |
|---------------|---------------|-------------|-------------------------|-----------|-----------|
|               |               |             | X                       | Y         | Z         |
| 1             | 7             | 0           | 0.161127                | 1.328738  | 0.000402  |
| 2             | 6             | 0           | 1.381033                | 0.719609  | 0.000010  |
| 3             | 6             | 0           | 2.605383                | 1.426212  | -0.000192 |
| 4             | 6             | 0           | 2.535981                | 2.837121  | -0.000082 |
| 5             | 6             | 0           | 1.297144                | 3.451514  | 0.000242  |
| 6             | 6             | 0           | 0.134132                | 2.661268  | 0.000487  |
| 7             | 6             | 0           | 3.834468                | 0.682990  | -0.000375 |
| 8             | 6             | 0           | 3.834844                | -0.681134 | -0.000261 |
| 9             | 6             | 0           | 2.606183                | -1.425064 | -0.000053 |
| 10            | 6             | 0           | 1.381443                | -0.719177 | -0.000047 |
| 11            | 6             | 0           | 2.537665                | -2.836025 | 0.000183  |
| 12            | 6             | 0           | 1.299195                | -3.451139 | 0.000369  |
| 13            | 6             | 0           | 0.135705                | -2.661609 | 0.000188  |
| 14            | 7             | 0           | 0.161838                | -1.329035 | -0.000084 |
| 15            | 29            | 0           | -1.298747               | -0.000991 | -0.000081 |
| 16            | 35            | 0           | -3.521650               | 0.000001  | -0.000104 |
| 17            | 1             | 0           | -0.850855               | -3.115286 | 0.000160  |
| 18            | 1             | 0           | 1.209409                | -4.532628 | 0.000587  |
| 19            | 1             | 0           | 3.453279                | -3.421462 | 0.000189  |
| 20            | 1             | 0           | -0.852733               | 3.114296  | 0.000795  |
| 21            | 1             | 0           | 1.206760                | 4.532953  | 0.000381  |
| 22            | 1             | 0           | 3.451232                | 3.423131  | -0.000249 |
| 23            | 1             | 0           | 4.772590                | -1.230393 | -0.000359 |
| 24            | 1             | 0           | 4.771912                | 1.232762  | -0.000574 |

**CPa**  
 SCF Done: E(RB+HF-LYP) = -7587.09403852 A.U.

| Center Number | Atomic Number | Atomic Type | Coordinates (Angstroms) |           |           |
|---------------|---------------|-------------|-------------------------|-----------|-----------|
|               |               |             | X                       | Y         | Z         |
| 1             | 7             | 0           | -1.261857               | 1.307611  | -0.002863 |
| 2             | 6             | 0           | -2.260497               | 0.422414  | -0.244990 |
| 3             | 6             | 0           | -3.624492               | 0.801008  | -0.319900 |
| 4             | 6             | 0           | -3.928525               | 2.165875  | -0.127867 |
| 5             | 6             | 0           | -2.905435               | 3.057685  | 0.128805  |
| 6             | 6             | 0           | -1.583161               | 2.581868  | 0.183169  |
| 7             | 6             | 0           | -1.894933               | -0.963670 | -0.403843 |
| 8             | 6             | 0           | -2.904534               | -1.932424 | -0.626886 |
| 9             | 6             | 0           | -4.274550               | -1.512597 | -0.714109 |
| 10            | 6             | 0           | -4.619887               | -0.202599 | -0.568803 |
| 11            | 6             | 0           | -2.499521               | -3.279404 | -0.740253 |
| 12            | 6             | 0           | -1.159317               | -3.593428 | -0.627829 |
| 13            | 6             | 0           | -0.229332               | -2.562861 | -0.410436 |
| 14            | 7             | 0           | -0.576989               | -1.282519 | -0.310057 |
| 15            | 29            | 0           | 0.578235                | 0.271395  | 0.361392  |
| 16            | 35            | 0           | 0.610860                | -0.042770 | 2.694544  |
| 17            | 1             | 0           | -0.756730               | 3.256507  | 0.385283  |
| 18            | 1             | 0           | -3.104828               | 4.112113  | 0.290467  |
| 19            | 1             | 0           | -4.962275               | 2.498499  | -0.176175 |
| 20            | 1             | 0           | 0.832094                | -2.770977 | -0.326795 |
| 21            | 1             | 0           | -0.812258               | -4.618709 | -0.703572 |
| 22            | 1             | 0           | -3.244627               | -4.052751 | -0.908159 |
| 23            | 1             | 0           | -5.661028               | 0.103472  | -0.627869 |
| 24            | 1             | 0           | -5.036057               | -2.267660 | -0.890281 |
| 25            | 6             | 0           | 2.186475                | 0.372264  | -0.896628 |
| 26            | 6             | 0           | 2.258157                | 1.416915  | 0.068381  |
| 27            | 6             | 0           | 1.986458                | 2.741877  | -0.368769 |
| 28            | 6             | 0           | 1.617307                | 3.003449  | -1.675151 |
| 29            | 6             | 0           | 1.550481                | 1.953657  | -2.617571 |
| 30            | 6             | 0           | 1.862354                | 0.658337  | -2.247155 |

|    |    |   |          |           |           |
|----|----|---|----------|-----------|-----------|
| 31 | 1  | 0 | 2.788537 | 1.266042  | 1.000883  |
| 32 | 1  | 0 | 2.095956 | 3.552699  | 0.346827  |
| 33 | 1  | 0 | 1.413475 | 4.023184  | -1.990415 |
| 34 | 1  | 0 | 1.280899 | 2.164823  | -3.648651 |
| 35 | 1  | 0 | 1.865096 | -0.145697 | -2.975639 |
| 36 | 35 | 0 | 3.158927 | -1.269739 | -0.546167 |

**TSa**

SCF Done: E(RB+HF-LYP) = -7587.08356114 A.U.

| Center Number | Atomic Number | Atomic Type | Coordinates (Angstroms) |           |           |
|---------------|---------------|-------------|-------------------------|-----------|-----------|
|               |               |             | X                       | Y         | Z         |
| 1             | 7             | 0           | -0.696722               | 1.356552  | 0.069240  |
| 2             | 6             | 0           | -1.993777               | 1.003965  | -0.129240 |
| 3             | 6             | 0           | -3.064591               | 1.928464  | -0.052485 |
| 4             | 6             | 0           | -2.742953               | 3.268455  | 0.251761  |
| 5             | 6             | 0           | -1.422197               | 3.614878  | 0.465847  |
| 6             | 6             | 0           | -0.429329               | 2.625315  | 0.367533  |
| 7             | 6             | 0           | -2.269180               | -0.384393 | -0.405874 |
| 8             | 6             | 0           | -3.607126               | -0.813709 | -0.588664 |
| 9             | 6             | 0           | -4.667213               | 0.152218  | -0.523404 |
| 10            | 6             | 0           | -4.406897               | 1.465403  | -0.267526 |
| 11            | 6             | 0           | -3.817932               | -2.190964 | -0.814533 |
| 12            | 6             | 0           | -2.733621               | -3.048022 | -0.838633 |
| 13            | 6             | 0           | -1.443353               | -2.522599 | -0.651226 |
| 14            | 7             | 0           | -1.211308               | -1.231099 | -0.449155 |
| 15            | 29            | 0           | 0.543635                | -0.282896 | 0.262177  |
| 16            | 35            | 0           | 0.752253                | -0.887803 | 2.521948  |
| 17            | 1             | 0           | 0.616011                | 2.863434  | 0.535127  |
| 18            | 1             | 0           | -1.140893               | 4.633948  | 0.710907  |
| 19            | 1             | 0           | -3.534961               | 4.009551  | 0.322094  |
| 20            | 1             | 0           | -0.567423               | -3.165677 | -0.659606 |
| 21            | 1             | 0           | -2.862603               | -4.113558 | -0.999086 |
| 22            | 1             | 0           | -4.828832               | -2.564139 | -0.957311 |
| 23            | 1             | 0           | -5.217912               | 2.186628  | -0.209763 |
| 24            | 1             | 0           | -5.688549               | -0.188316 | -0.672179 |
| 25            | 6             | 0           | 2.271059                | 0.232451  | -0.791394 |
| 26            | 6             | 0           | 3.088647                | 0.684527  | 0.259309  |
| 27            | 6             | 0           | 3.538718                | 2.005174  | 0.243869  |
| 28            | 6             | 0           | 3.250436                | 2.844120  | -0.836816 |
| 29            | 6             | 0           | 2.495267                | 2.360501  | -1.910864 |
| 30            | 6             | 0           | 2.033659                | 1.046078  | -1.912409 |
| 31            | 1             | 0           | 3.315414                | 0.025533  | 1.088325  |
| 32            | 1             | 0           | 4.136916                | 2.367681  | 1.075227  |
| 33            | 1             | 0           | 3.624854                | 3.863913  | -0.849984 |
| 34            | 1             | 0           | 2.284514                | 2.999833  | -2.764066 |
| 35            | 1             | 0           | 1.473095                | 0.656324  | -2.755033 |
| 36            | 35            | 0           | 2.147846                | -1.737354 | -1.093374 |

**PDa**

SCF Done: E(RB+HF-LYP) = -7587.09860692 A.U.

| Center Number | Atomic Number | Atomic Type | Coordinates (Angstroms) |           |           |
|---------------|---------------|-------------|-------------------------|-----------|-----------|
|               |               |             | X                       | Y         | Z         |
| 1             | 6             | 0           | 2.855885                | 1.422677  | -0.432346 |
| 2             | 6             | 0           | 2.524424                | 0.131529  | -0.039465 |
| 3             | 6             | 0           | 3.508901                | -0.785470 | 0.316685  |
| 4             | 6             | 0           | 4.848781                | -0.389847 | 0.295393  |
| 5             | 6             | 0           | 5.197594                | 0.909737  | -0.077130 |
| 6             | 6             | 0           | 4.200387                | 1.812190  | -0.443616 |
| 7             | 29            | 0           | 0.687753                | -0.371205 | 0.025629  |
| 8             | 35            | 0           | 0.870927                | -0.870524 | -2.210061 |
| 9             | 7             | 0           | -0.847145               | 1.493680  | -0.078262 |
| 10            | 6             | 0           | -2.106350               | 1.000683  | -0.077370 |
| 11            | 6             | 0           | -3.257852               | 1.828185  | -0.132237 |
| 12            | 6             | 0           | -3.048840               | 3.224060  | -0.178399 |
| 13            | 6             | 0           | -1.760465               | 3.717417  | -0.156195 |
| 14            | 6             | 0           | -0.686591               | 2.807434  | -0.103178 |
| 15            | 6             | 0           | -4.562634               | 1.230731  | -0.130808 |
| 16            | 6             | 0           | -4.715027               | -0.120846 | -0.062027 |
| 17            | 6             | 0           | -3.576006               | -0.990596 | 0.014875  |
| 18            | 6             | 0           | -2.271819               | -0.432712 | 0.005609  |
| 19            | 6             | 0           | -3.686479               | -2.394144 | 0.108621  |
| 20            | 6             | 0           | -2.543476               | -3.164291 | 0.191788  |
| 21            | 6             | 0           | -1.293547               | -2.526482 | 0.176777  |
| 22            | 7             | 0           | -1.164221               | -1.208062 | 0.084872  |
| 23            | 35            | 0           | 0.803860                | -0.304823 | 2.325913  |
| 24            | 1             | 0           | 0.338130                | 3.167181  | -0.071200 |
| 25            | 1             | 0           | -1.563722               | 4.784372  | -0.178617 |
| 26            | 1             | 0           | -3.904374               | 3.893194  | -0.222963 |
| 27            | 1             | 0           | -0.370853               | -3.094324 | 0.239728  |
| 28            | 1             | 0           | -2.593351               | -4.245151 | 0.267465  |
| 29            | 1             | 0           | -4.671245               | -2.853945 | 0.116862  |

|    |   |   |           |           |           |
|----|---|---|-----------|-----------|-----------|
| 30 | 1 | 0 | -5.431136 | 1.882048  | -0.181358 |
| 31 | 1 | 0 | -5.706084 | -0.566331 | -0.058259 |
| 32 | 1 | 0 | 3.245123  | -1.795261 | 0.613789  |
| 33 | 1 | 0 | 5.618479  | -1.103825 | 0.578321  |
| 34 | 1 | 0 | 6.240923  | 1.213456  | -0.088444 |
| 35 | 1 | 0 | 4.460093  | 2.821771  | -0.753279 |
| 36 | 1 | 0 | 2.093895  | 2.118077  | -0.768236 |

**B**

SCF Done: E(RB+HF-LYP) = -2518.83274992 A.U.

| Center Number | Atomic Number | Atomic Type | Coordinates (Angstroms) |           |           |
|---------------|---------------|-------------|-------------------------|-----------|-----------|
|               |               |             | X                       | Y         | Z         |
| 1             | 29            | 0           | 0.609920                | 0.052312  | -0.520798 |
| 2             | 7             | 0           | -0.778161               | 1.269580  | -0.323771 |
| 3             | 6             | 0           | -2.010948               | 0.724245  | -0.066755 |
| 4             | 6             | 0           | -2.093731               | -0.711266 | 0.019355  |
| 5             | 7             | 0           | -0.953301               | -1.406133 | -0.211777 |
| 6             | 6             | 0           | -0.989964               | -2.728126 | -0.115329 |
| 7             | 6             | 0           | -2.162853               | -3.440601 | 0.201865  |
| 8             | 6             | 0           | -3.334435               | -2.739955 | 0.422024  |
| 9             | 6             | 0           | -3.327980               | -1.330208 | 0.335558  |
| 10            | 6             | 0           | -4.486439               | -0.509205 | 0.543708  |
| 11            | 6             | 0           | -4.410664               | 0.848462  | 0.444149  |
| 12            | 6             | 0           | -3.170264               | 1.507789  | 0.141447  |
| 13            | 6             | 0           | -3.040256               | 2.910205  | 0.048033  |
| 14            | 6             | 0           | -0.695720               | 2.605729  | -0.403469 |
| 15            | 1             | 0           | 0.290556                | 3.009148  | -0.602603 |
| 16            | 1             | 0           | -1.658519               | 4.525987  | -0.307130 |
| 17            | 1             | 0           | -3.909088               | 3.544948  | 0.198655  |
| 18            | 1             | 0           | -5.293808               | 1.461937  | 0.600940  |
| 19            | 1             | 0           | -5.430844               | -0.991958 | 0.781034  |
| 20            | 1             | 0           | -4.258968               | -3.259226 | 0.661424  |
| 21            | 1             | 0           | -2.136555               | -4.523970 | 0.261421  |
| 22            | 1             | 0           | -0.048333               | -3.239333 | -0.299128 |
| 23            | 8             | 0           | 2.131220                | -0.914891 | -0.566903 |
| 24            | 6             | 0           | 3.297555                | -0.438666 | -0.142590 |
| 25            | 6             | 0           | 4.487776                | -1.164723 | -0.367324 |
| 26            | 6             | 0           | 5.714053                | -0.683777 | 0.085606  |
| 27            | 6             | 0           | 5.802256                | 0.527089  | 0.780075  |
| 28            | 6             | 0           | 4.630694                | 1.253241  | 1.016095  |
| 29            | 6             | 0           | 3.402140                | 0.780415  | 0.566108  |
| 30            | 1             | 0           | 4.421338                | -2.105267 | -0.907946 |
| 31            | 1             | 0           | 6.615664                | -1.262627 | -0.106482 |
| 32            | 1             | 0           | 6.762263                | 0.895609  | 1.131376  |
| 33            | 1             | 0           | 4.675244                | 2.195499  | 1.559494  |
| 34            | 1             | 0           | 2.476648                | 1.326714  | 0.744431  |
| 35            | 6             | 0           | -1.798355               | 3.452766  | -0.229940 |

**CPb**

SCF Done: E(RB+HF-LYP) = -5322.20611232 A.U.

| Center Number | Atomic Number | Atomic Type | Coordinates (Angstroms) |           |           |
|---------------|---------------|-------------|-------------------------|-----------|-----------|
|               |               |             | X                       | Y         | Z         |
| 1             | 6             | 0           | -0.925353               | 2.814933  | -0.782936 |
| 2             | 6             | 0           | -1.292103               | 2.365081  | 0.508231  |
| 3             | 6             | 0           | -2.068304               | 3.246853  | 1.299486  |
| 4             | 6             | 0           | -2.451895               | 4.496385  | 0.821896  |
| 5             | 6             | 0           | -2.081088               | 4.924239  | -0.457758 |
| 6             | 6             | 0           | -1.313756               | 4.068121  | -1.251669 |
| 7             | 8             | 0           | -0.949672               | 1.176708  | 0.983291  |
| 8             | 29            | 0           | 0.190802                | -0.029743 | 0.088395  |
| 9             | 7             | 0           | 1.667556                | -0.033155 | -1.201230 |
| 10            | 6             | 0           | 2.877179                | -0.233934 | -0.593277 |
| 11            | 6             | 0           | 4.109255                | -0.202135 | -1.291056 |
| 12            | 6             | 0           | 4.063962                | -0.016629 | -2.687921 |
| 13            | 6             | 0           | 2.834161                | 0.141073  | -3.305247 |
| 14            | 6             | 0           | 1.667454                | 0.135148  | -2.529372 |
| 15            | 6             | 0           | 2.865336                | -0.438687 | 0.828616  |
| 16            | 6             | 0           | 4.086606                | -0.544262 | 1.538583  |
| 17            | 6             | 0           | 5.321099                | -0.491331 | 0.806896  |
| 18            | 6             | 0           | 5.330988                | -0.342834 | -0.548161 |
| 19            | 6             | 0           | 4.009996                | -0.705239 | 2.937524  |
| 20            | 6             | 0           | 2.766607                | -0.755242 | 3.544618  |
| 21            | 6             | 0           | 1.610815                | -0.670865 | 2.751847  |
| 22            | 7             | 0           | 1.645425                | -0.528935 | 1.427267  |
| 23            | 6             | 0           | -3.135354               | -1.688667 | -0.240081 |
| 24            | 6             | 0           | -4.028766               | -2.650065 | -0.702361 |
| 25            | 6             | 0           | -5.346843               | -2.602132 | -0.243517 |
| 26            | 6             | 0           | -5.743032               | -1.608837 | 0.654330  |
| 27            | 6             | 0           | -4.820417               | -0.659141 | 1.096956  |
| 28            | 6             | 0           | -3.494875               | -0.685677 | 0.653350  |
| 29            | 35            | 0           | -1.308747               | -1.761187 | -0.883071 |

|    |   |   |           |           |           |
|----|---|---|-----------|-----------|-----------|
| 30 | 1 | 0 | 0.622036  | -0.723441 | 3.197887  |
| 31 | 1 | 0 | 2.671258  | -0.876976 | 4.618854  |
| 32 | 1 | 0 | 4.922416  | -0.787065 | 3.522306  |
| 33 | 1 | 0 | 0.696028  | 0.297162  | -2.987170 |
| 34 | 1 | 0 | 2.759197  | 0.290679  | -4.377509 |
| 35 | 1 | 0 | 4.986736  | 0.008760  | -3.261080 |
| 36 | 1 | 0 | 6.253791  | -0.579703 | 1.357885  |
| 37 | 1 | 0 | 6.271509  | -0.312454 | -1.091876 |
| 38 | 1 | 0 | -2.762682 | 0.049222  | 0.982584  |
| 39 | 1 | 0 | -5.126899 | 0.118426  | 1.791100  |
| 40 | 1 | 0 | -6.770449 | -1.574697 | 1.006031  |
| 41 | 1 | 0 | -6.060130 | -3.343952 | -0.592410 |
| 42 | 1 | 0 | -3.708758 | -3.416479 | -1.400448 |
| 43 | 1 | 0 | -2.352884 | 2.919951  | 2.296897  |
| 44 | 1 | 0 | -3.048173 | 5.148669  | 1.457871  |
| 45 | 1 | 0 | -2.382621 | 5.901213  | -0.825783 |
| 46 | 1 | 0 | -1.012787 | 4.379827  | -2.250682 |
| 47 | 1 | 0 | -0.328209 | 2.148995  | -1.402848 |

**TSb**

SCF Done: E(RB+HF-LYP) = -5322.19465127 A.U.

| Center Number | Atomic Number | Atomic Type | Coordinates (Angstroms) |           |           |
|---------------|---------------|-------------|-------------------------|-----------|-----------|
|               |               |             | X                       | Y         | Z         |
| 1             | 6             | 0           | -0.475175               | 2.655674  | 1.586136  |
| 2             | 6             | 0           | -1.328000               | 1.708047  | 1.000741  |
| 3             | 6             | 0           | -2.305710               | 2.098476  | 0.072491  |
| 4             | 6             | 0           | -2.318045               | 3.417520  | -0.373327 |
| 5             | 6             | 0           | -1.422390               | 4.359252  | 0.147699  |
| 6             | 6             | 0           | -0.502824               | 3.972690  | 1.125566  |
| 7             | 29            | 0           | -0.158955               | 0.128173  | 0.055788  |
| 8             | 35            | 0           | -1.662570               | 0.056248  | 2.066125  |
| 9             | 7             | 0           | 1.553641                | 1.049722  | -0.580342 |
| 10            | 6             | 0           | 2.628507                | 0.217937  | -0.526563 |
| 11            | 6             | 0           | 3.868119                | 0.514576  | -1.144802 |
| 12            | 6             | 0           | 3.958187                | 1.721491  | -1.869890 |
| 13            | 6             | 0           | 2.854200                | 2.551869  | -1.937414 |
| 14            | 6             | 0           | 1.672912                | 2.180889  | -1.274390 |
| 15            | 6             | 0           | 4.955865                | -0.413047 | -1.007774 |
| 16            | 6             | 0           | 4.814413                | -1.566659 | -0.295621 |
| 17            | 6             | 0           | 3.567550                | -1.901361 | 0.332835  |
| 18            | 6             | 0           | 2.472614                | -1.010057 | 0.208977  |
| 19            | 6             | 0           | 3.357845                | -3.085287 | 1.070692  |
| 20            | 6             | 0           | 2.114529                | -3.324193 | 1.628101  |
| 21            | 6             | 0           | 1.087560                | -2.385322 | 1.436481  |
| 22            | 7             | 0           | 1.248843                | -1.261546 | 0.743329  |
| 23            | 8             | 0           | -1.224014               | -0.310425 | -1.468645 |
| 24            | 1             | 0           | 0.797139                | 2.821348  | -1.295125 |
| 25            | 1             | 0           | 2.887428                | 3.486044  | -2.488729 |
| 26            | 1             | 0           | 4.888822                | 1.984738  | -2.365727 |
| 27            | 1             | 0           | 0.096267                | -2.550406 | 1.850634  |
| 28            | 1             | 0           | 1.918613                | -4.224740 | 2.201076  |
| 29            | 1             | 0           | 4.170855                | -3.796559 | 1.190614  |
| 30            | 1             | 0           | 5.901483                | -0.175001 | -1.487736 |
| 31            | 1             | 0           | 5.645724                | -2.259917 | -0.198466 |
| 32            | 1             | 0           | -2.996890               | 1.367057  | -0.328508 |
| 33            | 1             | 0           | -3.047477               | 3.713526  | -1.122207 |
| 34            | 1             | 0           | -1.455495               | 5.390066  | -0.193673 |
| 35            | 1             | 0           | 0.179407                | 4.700823  | 1.556592  |
| 36            | 1             | 0           | 0.212359                | 2.357792  | 2.370043  |
| 37            | 6             | 0           | -2.247147               | -1.141116 | -1.499828 |
| 38            | 6             | 0           | -3.417509               | -0.811552 | -2.231183 |
| 39            | 6             | 0           | -4.507511               | -1.677514 | -2.284107 |
| 40            | 6             | 0           | -4.485304               | -2.904454 | -1.614162 |
| 41            | 6             | 0           | -3.338079               | -3.251710 | -0.892871 |
| 42            | 6             | 0           | -2.241645               | -2.396359 | -0.837664 |
| 43            | 1             | 0           | -3.430552               | 0.135425  | -2.766134 |
| 44            | 1             | 0           | -5.387936               | -1.390839 | -2.857164 |
| 45            | 1             | 0           | -5.339019               | -3.575587 | -1.655238 |
| 46            | 1             | 0           | -3.296891               | -4.206436 | -0.370304 |
| 47            | 1             | 0           | -1.347258               | -2.675621 | -0.284632 |

**PDb**

SCF Done: E(RB+HF-LYP) = -5322.21641926 A.U.

| Center Number | Atomic Number | Atomic Type | Coordinates (Angstroms) |          |           |
|---------------|---------------|-------------|-------------------------|----------|-----------|
|               |               |             | X                       | Y        | Z         |
| 1             | 6             | 0           | 1.784187                | 2.579290 | 0.035076  |
| 2             | 6             | 0           | 1.309504                | 1.899977 | -1.111629 |
| 3             | 6             | 0           | 1.588821                | 2.472378 | -2.374649 |
| 4             | 6             | 0           | 2.275997                | 3.676457 | -2.476980 |
| 5             | 6             | 0           | 2.735485                | 4.342144 | -1.334503 |
| 6             | 6             | 0           | 2.490138                | 3.777035 | -0.082512 |



|    |    |   |           |           |           |
|----|----|---|-----------|-----------|-----------|
| 7  | 8  | 0 | 0.587108  | 0.784357  | -1.069947 |
| 8  | 29 | 0 | 0.463151  | -0.288361 | 0.448561  |
| 9  | 7  | 0 | -1.289295 | 0.678774  | 0.946794  |
| 10 | 6  | 0 | -2.423807 | 0.381901  | 0.265616  |
| 11 | 6  | 0 | -3.625607 | 1.110889  | 0.461780  |
| 12 | 6  | 0 | -3.610714 | 2.159584  | 1.406311  |
| 13 | 6  | 0 | -2.451502 | 2.431655  | 2.102448  |
| 14 | 6  | 0 | -1.308883 | 1.656583  | 1.844662  |
| 15 | 6  | 0 | -2.400288 | -0.709552 | -0.682991 |
| 16 | 6  | 0 | -3.573679 | -1.007068 | -1.425003 |
| 17 | 6  | 0 | -4.768751 | -0.244674 | -1.205303 |
| 18 | 6  | 0 | -4.794971 | 0.767793  | -0.295557 |
| 19 | 6  | 0 | -3.498793 | -2.061885 | -2.361101 |
| 20 | 6  | 0 | -2.310908 | -2.744426 | -2.518710 |
| 21 | 6  | 0 | -1.207694 | -2.377078 | -1.723237 |
| 22 | 7  | 0 | -1.248285 | -1.403094 | -0.827401 |
| 23 | 6  | 0 | 2.072363  | -1.199872 | 0.013575  |
| 24 | 6  | 0 | 1.986167  | -2.570868 | -0.220063 |
| 25 | 6  | 0 | 3.120642  | -3.264830 | -0.654802 |
| 26 | 6  | 0 | 4.333273  | -2.596262 | -0.823371 |
| 27 | 6  | 0 | 4.410046  | -1.230538 | -0.550339 |
| 28 | 6  | 0 | 3.278276  | -0.526100 | -0.123783 |
| 29 | 35 | 0 | 0.662892  | -1.144132 | 2.564794  |
| 30 | 1  | 0 | -0.257196 | -2.892474 | -1.827551 |
| 31 | 1  | 0 | -2.214209 | -3.553586 | -3.235368 |
| 32 | 1  | 0 | -4.376000 | -2.319140 | -2.949400 |
| 33 | 1  | 0 | -0.385781 | 1.828744  | 2.387093  |
| 34 | 1  | 0 | -2.406007 | 3.225764  | 2.839923  |
| 35 | 1  | 0 | -4.514386 | 2.739257  | 1.575864  |
| 36 | 1  | 0 | -5.656006 | -0.493588 | -1.781403 |
| 37 | 1  | 0 | -5.703375 | 1.340751  | -0.130425 |
| 38 | 1  | 0 | 3.354096  | 0.537661  | 0.077943  |
| 39 | 1  | 0 | 5.351404  | -0.699590 | -0.668928 |
| 40 | 1  | 0 | 5.215674  | -3.138840 | -1.152158 |
| 41 | 1  | 0 | 3.053775  | -4.334943 | -0.837072 |
| 42 | 1  | 0 | 1.064873  | -3.112549 | -0.033898 |
| 43 | 1  | 0 | 1.237443  | 1.948865  | -3.259059 |
| 44 | 1  | 0 | 2.465886  | 4.097754  | -3.461936 |
| 45 | 1  | 0 | 3.281282  | 5.277327  | -1.421478 |
| 46 | 1  | 0 | 2.849361  | 4.271560  | 0.817456  |
| 47 | 1  | 0 | 1.616959  | 2.144321  | 1.018570  |

**TSrd**

SCF Done: E(RB+HF-LYP) = -5322.20111610 A.U.

| Center Number | Atomic Number | Atomic Type | Coordinates (Angstroms) |           |           |
|---------------|---------------|-------------|-------------------------|-----------|-----------|
|               |               |             | X                       | Y         | Z         |
| 1             | 6             | 0           | -2.489381               | 1.786321  | 0.585452  |
| 2             | 6             | 0           | -1.559199               | 1.445577  | -0.394414 |
| 3             | 6             | 0           | -1.277605               | 2.299028  | -1.462693 |
| 4             | 6             | 0           | -1.837603               | 3.578831  | -1.471314 |
| 5             | 6             | 0           | -2.718349               | 3.969449  | -0.459336 |
| 6             | 6             | 0           | -3.043172               | 3.068395  | 0.558083  |
| 7             | 29            | 0           | -0.174902               | 0.154242  | 0.039592  |
| 8             | 35            | 0           | -0.090628               | -0.107716 | 2.431982  |
| 9             | 8             | 0           | -1.618894               | -0.321351 | -1.115656 |
| 10            | 6             | 0           | -2.742229               | -1.009700 | -0.772823 |
| 11            | 6             | 0           | -2.913731               | -1.639531 | 0.470581  |
| 12            | 6             | 0           | -4.066136               | -2.390904 | 0.708246  |
| 13            | 6             | 0           | -5.048234               | -2.527065 | -0.274634 |
| 14            | 6             | 0           | -4.878386               | -1.888732 | -1.507054 |
| 15            | 6             | 0           | -3.741431               | -1.123701 | -1.754217 |
| 16            | 7             | 0           | 1.145358                | -1.438215 | -0.394662 |
| 17            | 6             | 0           | 2.437210                | -1.040785 | -0.452536 |
| 18            | 6             | 0           | 3.516712                | -1.950349 | -0.558172 |
| 19            | 6             | 0           | 3.194783                | -3.324413 | -0.613707 |
| 20            | 6             | 0           | 1.870860                | -3.716734 | -0.555404 |
| 21            | 6             | 0           | 0.869945                | -2.734600 | -0.438635 |
| 22            | 6             | 0           | 4.858066                | -1.439549 | -0.587941 |
| 23            | 6             | 0           | 5.102387                | -0.100942 | -0.500893 |
| 24            | 6             | 0           | 4.028227                | 0.845536  | -0.384683 |
| 25            | 6             | 0           | 2.692853                | 0.375242  | -0.377537 |
| 26            | 6             | 0           | 4.222631                | 2.239085  | -0.266911 |
| 27            | 6             | 0           | 3.124494                | 3.068652  | -0.147527 |
| 28            | 6             | 0           | 1.835212                | 2.506531  | -0.160318 |
| 29            | 7             | 0           | 1.619406                | 1.202054  | -0.283079 |
| 30            | 1             | 0           | 0.949048                | 3.128695  | -0.076150 |
| 31            | 1             | 0           | 3.238785                | 4.142889  | -0.046135 |
| 32            | 1             | 0           | 5.231652                | 2.643206  | -0.265075 |
| 33            | 1             | 0           | -0.181006               | -3.001346 | -0.371997 |
| 34            | 1             | 0           | 1.593018                | -4.765007 | -0.590150 |
| 35            | 1             | 0           | 3.991038                | -4.059855 | -0.695425 |
| 36            | 1             | 0           | 6.122309                | 0.274078  | -0.511653 |
| 37            | 1             | 0           | 5.680515                | -2.145147 | -0.669847 |
| 38            | 1             | 0           | -2.737657               | 1.090816  | 1.377573  |

|    |   |   |           |           |           |
|----|---|---|-----------|-----------|-----------|
| 39 | 1 | 0 | -3.736122 | 3.357877  | 1.343911  |
| 40 | 1 | 0 | -3.165033 | 4.959534  | -0.475641 |
| 41 | 1 | 0 | -1.604387 | 4.256439  | -2.289201 |
| 42 | 1 | 0 | -0.638569 | 1.966246  | -2.274534 |
| 43 | 1 | 0 | -3.595272 | -0.618203 | -2.704053 |
| 44 | 1 | 0 | -5.639455 | -1.980892 | -2.278141 |
| 45 | 1 | 0 | -5.940066 | -3.117010 | -0.081574 |
| 46 | 1 | 0 | -4.192423 | -2.872569 | 1.674779  |
| 47 | 1 | 0 | -2.161967 | -1.512611 | 1.245519  |

**PDrd**

SCF Done: E(RB+HF-LYP) = -5322.24154531 A.U.

| Center Number | Atomic Number | Atomic Type | Coordinates (Angstroms) |           |           |
|---------------|---------------|-------------|-------------------------|-----------|-----------|
|               |               |             | X                       | Y         | Z         |
| 1             | 7             | 0           | 1.576321                | 1.048918  | 0.221967  |
| 2             | 6             | 0           | 2.689933                | 0.378377  | -0.190677 |
| 3             | 6             | 0           | 3.939301                | 1.008845  | -0.405186 |
| 4             | 6             | 0           | 4.016067                | 2.396114  | -0.158739 |
| 5             | 6             | 0           | 2.885439                | 3.068165  | 0.272705  |
| 6             | 6             | 0           | 1.686099                | 2.359441  | 0.446756  |
| 7             | 6             | 0           | 2.553863                | -1.037154 | -0.404012 |
| 8             | 6             | 0           | 3.663418                | -1.792616 | -0.854888 |
| 9             | 6             | 0           | 4.914381                | -1.122987 | -1.078440 |
| 10            | 6             | 0           | 5.048037                | 0.215781  | -0.857183 |
| 11            | 6             | 0           | 3.471274                | -3.176551 | -1.050303 |
| 12            | 6             | 0           | 2.228811                | -3.727888 | -0.789299 |
| 13            | 6             | 0           | 1.192310                | -2.901918 | -0.327577 |
| 14            | 7             | 0           | 1.335848                | -1.589865 | -0.127237 |
| 15            | 29            | 0           | 0.123660                | -0.236186 | 0.679055  |
| 16            | 8             | 0           | -1.648433               | 0.028729  | -0.627673 |
| 17            | 6             | 0           | -2.771997               | -0.797831 | -0.772561 |
| 18            | 6             | 0           | -3.032865               | -1.727228 | 0.231745  |
| 19            | 6             | 0           | -4.097901               | -2.614592 | 0.063591  |
| 20            | 6             | 0           | -4.892074               | -2.564778 | -1.083711 |
| 21            | 6             | 0           | -4.621099               | -1.615372 | -2.071898 |
| 22            | 6             | 0           | -3.555263               | -0.727010 | -1.924620 |
| 23            | 6             | 0           | -1.824532               | 1.406346  | -0.781253 |
| 24            | 6             | 0           | -2.545311               | 2.125979  | 0.172421  |
| 25            | 6             | 0           | -2.672065               | 3.506647  | 0.019115  |
| 26            | 6             | 0           | -2.087379               | 4.156338  | -1.072366 |
| 27            | 6             | 0           | -1.365694               | 3.420610  | -2.014372 |
| 28            | 6             | 0           | -1.233996               | 2.036882  | -1.874580 |
| 29            | 35            | 0           | -0.808186               | -0.190616 | 2.781404  |
| 30            | 1             | 0           | 0.781352                | 2.858841  | 0.780397  |
| 31            | 1             | 0           | 2.908681                | 4.134828  | 0.472026  |
| 32            | 1             | 0           | 4.956738                | 2.919810  | -0.307509 |
| 33            | 1             | 0           | 0.213166                | -3.312116 | -0.098567 |
| 34            | 1             | 0           | 2.044995                | -4.788632 | -0.927115 |
| 35            | 1             | 0           | 4.296378                | -3.792999 | -1.397166 |
| 36            | 1             | 0           | 6.003450                | 0.707683  | -1.020520 |
| 37            | 1             | 0           | 5.761534                | -1.711472 | -1.421086 |
| 38            | 1             | 0           | -2.961154               | 1.604937  | 1.027995  |
| 39            | 1             | 0           | -3.225110               | 4.076657  | 0.760510  |
| 40            | 1             | 0           | -2.191532               | 5.231901  | -1.185277 |
| 41            | 1             | 0           | -0.907759               | 3.919769  | -2.864096 |
| 42            | 1             | 0           | -0.674861               | 1.444648  | -2.592323 |
| 43            | 1             | 0           | -3.331435               | 0.009740  | -2.689598 |
| 44            | 1             | 0           | -5.236440               | -1.566918 | -2.966421 |
| 45            | 1             | 0           | -5.721905               | -3.255453 | -1.205048 |
| 46            | 1             | 0           | -4.312769               | -3.338099 | 0.845436  |
| 47            | 1             | 0           | -2.433228               | -1.706975 | 1.136924  |

**C**

SCF Done: E(RB+HF-LYP) = -2783.46069709 A.U.

| Center Number | Atomic Number | Atomic Type | Coordinates (Angstroms) |           |           |
|---------------|---------------|-------------|-------------------------|-----------|-----------|
|               |               |             | X                       | Y         | Z         |
| 1             | 6             | 0           | -1.475134               | 1.893974  | -1.890625 |
| 2             | 7             | 0           | -1.489843               | 0.949605  | -0.948017 |
| 3             | 6             | 0           | -2.704286               | 0.508916  | -0.508128 |
| 4             | 6             | 0           | -3.933010               | 1.006633  | -1.005046 |
| 5             | 6             | 0           | -3.874334               | 2.004957  | -2.001578 |
| 6             | 6             | 0           | -2.641678               | 2.447577  | -2.443279 |
| 7             | 29            | 0           | -0.000004               | 0.000102  | -0.000002 |
| 8             | 7             | 0           | 1.489743                | -0.948483 | -0.949113 |
| 9             | 6             | 0           | 2.704235                | -0.508469 | -0.508685 |
| 10            | 6             | 0           | 3.932902                | -1.005935 | -1.005992 |
| 11            | 6             | 0           | 3.874114                | -2.003345 | -2.003432 |
| 12            | 6             | 0           | 2.641408                | -2.445319 | -2.445640 |
| 13            | 6             | 0           | 1.474925                | -1.891965 | -1.892603 |
| 14            | 6             | 0           | 5.162841                | -0.482057 | -0.481933 |
| 15            | 6             | 0           | 5.162887                | 0.481746  | 0.481896  |

|    |   |   |           |           |           |
|----|---|---|-----------|-----------|-----------|
| 16 | 6 | 0 | 3.932998  | 1.005790  | 1.005907  |
| 17 | 6 | 0 | 2.704284  | 0.508491  | 0.508551  |
| 18 | 7 | 0 | 1.489834  | 0.948662  | 0.948936  |
| 19 | 6 | 0 | 1.475106  | 1.892147  | 1.892427  |
| 20 | 6 | 0 | 2.641642  | 2.445337  | 2.445514  |
| 21 | 6 | 0 | 3.874306  | 2.003199  | 2.003353  |
| 22 | 1 | 0 | 0.496390  | 2.224687  | 2.225099  |
| 23 | 1 | 0 | 2.559275  | 3.210194  | 3.210368  |
| 24 | 1 | 0 | 4.793952  | 2.412162  | 2.412324  |
| 25 | 1 | 0 | 0.496178  | -2.224358 | -2.225329 |
| 26 | 1 | 0 | 2.558969  | -3.210170 | -3.210492 |
| 27 | 1 | 0 | 4.793721  | -2.412441 | -2.412359 |
| 28 | 1 | 0 | 6.099119  | 0.871146  | 0.871373  |
| 29 | 1 | 0 | 6.099036  | -0.871589 | -0.871367 |
| 30 | 6 | 0 | -5.162892 | 0.482091  | -0.481519 |
| 31 | 1 | 0 | -4.793988 | 2.414240  | -2.410212 |
| 32 | 1 | 0 | -2.559324 | 3.213127  | -3.207441 |
| 33 | 1 | 0 | -0.496423 | 2.226872  | -2.222954 |
| 34 | 6 | 0 | -2.704224 | -0.509017 | 0.508134  |
| 35 | 6 | 0 | -3.932885 | -1.006862 | 1.005077  |
| 36 | 6 | 0 | -3.874086 | -2.005036 | 2.001751  |
| 37 | 6 | 0 | -2.641375 | -2.447385 | 2.443571  |
| 38 | 6 | 0 | -1.474899 | -1.893703 | 1.890852  |
| 39 | 7 | 0 | -1.489726 | -0.949489 | 0.948092  |
| 40 | 6 | 0 | -5.162833 | -0.482540 | 0.481482  |
| 41 | 1 | 0 | -4.793689 | -2.414408 | 2.410411  |
| 42 | 1 | 0 | -2.558927 | -3.212793 | 3.207866  |
| 43 | 1 | 0 | -0.496147 | -2.226437 | 2.223226  |
| 44 | 1 | 0 | -6.099020 | -0.872409 | 0.870597  |
| 45 | 1 | 0 | -6.099128 | 0.871811  | -0.870668 |

**D**  
 SCF Done: E(RB+HF-LYP) = -2254.13883598 A.U.

| Center Number | Atomic Number | Atomic Type | Coordinates (Angstroms) |           |           |
|---------------|---------------|-------------|-------------------------|-----------|-----------|
|               |               |             | X                       | Y         | Z         |
| 1             | 6             | 0           | -2.636212               | 0.860269  | 0.357938  |
| 2             | 6             | 0           | -2.605508               | -0.445629 | -0.201355 |
| 3             | 6             | 0           | -3.812351               | -1.188561 | -0.155548 |
| 4             | 6             | 0           | -4.966625               | -0.656600 | 0.412760  |
| 5             | 6             | 0           | -4.978104               | 0.632025  | 0.959145  |
| 6             | 6             | 0           | -3.795253               | 1.380485  | 0.921724  |
| 7             | 8             | 0           | -1.522342               | -0.963434 | -0.744078 |
| 8             | 29            | 0           | -0.000349               | -0.004422 | -0.738991 |
| 9             | 8             | 0           | 1.519974                | 0.957010  | -0.747639 |
| 10            | 6             | 0           | 2.604635                | 0.444237  | -0.203167 |
| 11            | 6             | 0           | 3.810076                | 1.189732  | -0.162478 |
| 12            | 6             | 0           | 4.965852                | 0.663122  | 0.407779  |
| 13            | 6             | 0           | 4.980265                | -0.622414 | 0.961294  |
| 14            | 6             | 0           | 3.798796                | -1.373327 | 0.929079  |
| 15            | 6             | 0           | 2.638304                | -0.858451 | 0.363403  |
| 16            | 1             | 0           | 1.712579                | -1.429172 | 0.325484  |
| 17            | 1             | 0           | 3.782804                | -2.377287 | 1.352558  |
| 18            | 1             | 0           | 5.886661                | -1.027890 | 1.405363  |
| 19            | 1             | 0           | 5.873843                | 1.266302  | 0.420975  |
| 20            | 1             | 0           | 3.804251                | 2.188993  | -0.591683 |
| 21            | 1             | 0           | -3.808774               | -2.190185 | -0.579233 |
| 22            | 1             | 0           | -5.875755               | -1.257958 | 0.430080  |
| 23            | 1             | 0           | -5.883342               | 1.041674  | 1.401745  |
| 24            | 1             | 0           | -3.776971               | 2.386752  | 1.339595  |
| 25            | 1             | 0           | -1.709482               | 1.429075  | 0.316155  |

**CPd**  
 SCF Done: E(RB+HF-LYP) = -5057.50424187 A.U.

| Center Number | Atomic Number | Atomic Type | Coordinates (Angstroms) |           |           |
|---------------|---------------|-------------|-------------------------|-----------|-----------|
|               |               |             | X                       | Y         | Z         |
| 1             | 6             | 0           | 1.609089                | 2.129475  | -0.302446 |
| 2             | 6             | 0           | 0.227071                | 1.942163  | -0.078145 |
| 3             | 6             | 0           | -0.387302               | 2.573450  | 1.025637  |
| 4             | 6             | 0           | 0.401540                | 3.224069  | 1.968201  |
| 5             | 6             | 0           | 1.785641                | 3.338009  | 1.793061  |
| 6             | 6             | 0           | 2.379369                | 2.783131  | 0.654960  |
| 7             | 29            | 0           | -0.029290               | -0.053419 | 0.075599  |
| 8             | 35            | 0           | -0.903511               | 1.756789  | -1.738052 |
| 9             | 8             | 0           | -1.568511               | -0.145459 | 1.149690  |
| 10            | 6             | 0           | -2.579745               | -0.907341 | 0.786946  |
| 11            | 6             | 0           | -3.757387               | -0.950459 | 1.578132  |
| 12            | 6             | 0           | -4.842432               | -1.745587 | 1.222088  |
| 13            | 6             | 0           | -4.810545               | -2.536232 | 0.067667  |
| 14            | 6             | 0           | -3.657651               | -2.507745 | -0.724687 |
| 15            | 6             | 0           | -2.565479               | -1.716770 | -0.380982 |
| 16            | 8             | 0           | 1.282508                | -0.912471 | -0.945288 |

|    |   |   |           |           |           |
|----|---|---|-----------|-----------|-----------|
| 17 | 6 | 0 | 2.341877  | -1.503573 | -0.440641 |
| 18 | 6 | 0 | 2.569261  | -1.637075 | 0.955438  |
| 19 | 6 | 0 | 3.704351  | -2.273966 | 1.448506  |
| 20 | 6 | 0 | 4.666930  | -2.806651 | 0.584250  |
| 21 | 6 | 0 | 4.460965  | -2.686047 | -0.795262 |
| 22 | 6 | 0 | 3.330361  | -2.051939 | -1.300595 |
| 23 | 1 | 0 | 3.172367  | -1.961407 | -2.372811 |
| 24 | 1 | 0 | 5.195853  | -3.094799 | -1.488839 |
| 25 | 1 | 0 | 5.552693  | -3.302735 | 0.974424  |
| 26 | 1 | 0 | 3.838825  | -2.357057 | 2.526578  |
| 27 | 1 | 0 | 1.819648  | -1.232889 | 1.633602  |
| 28 | 1 | 0 | -1.674081 | -1.701935 | -1.005858 |
| 29 | 1 | 0 | -3.606844 | -3.114618 | -1.628200 |
| 30 | 1 | 0 | -5.660928 | -3.156008 | -0.207592 |
| 31 | 1 | 0 | -5.728802 | -1.750750 | 1.856701  |
| 32 | 1 | 0 | -3.784347 | -0.338002 | 2.476621  |
| 33 | 1 | 0 | -1.453692 | 2.459952  | 1.172017  |
| 34 | 1 | 0 | -0.074535 | 3.656449  | 2.845628  |
| 35 | 1 | 0 | 2.391990  | 3.855802  | 2.531819  |
| 36 | 1 | 0 | 3.452481  | 2.867891  | 0.500454  |
| 37 | 1 | 0 | 2.064199  | 1.693610  | -1.183069 |

**TSd**

SCF Done: E(RB+HF-LYP) = -5057.50369017 A.U.

| Center Number | Atomic Number | Atomic Type | Coordinates (Angstroms) |           |           |
|---------------|---------------|-------------|-------------------------|-----------|-----------|
|               |               |             | X                       | Y         | Z         |
| 1             | 6             | 0           | 3.478182                | 1.285595  | 1.644762  |
| 2             | 6             | 0           | 2.474889                | 1.059527  | 0.664880  |
| 3             | 6             | 0           | 2.810818                | 1.390131  | -0.675672 |
| 4             | 6             | 0           | 4.061875                | 1.903545  | -1.004596 |
| 5             | 6             | 0           | 5.037430                | 2.115749  | -0.024304 |
| 6             | 6             | 0           | 4.725206                | 1.799665  | 1.303030  |
| 7             | 8             | 0           | 1.301629                | 0.583878  | 1.017360  |
| 8             | 29            | 0           | -0.053350               | -0.073832 | -0.139126 |
| 9             | 8             | 0           | -1.606983               | 0.526890  | -1.020389 |
| 10            | 6             | 0           | -2.360136               | 1.499774  | -0.550252 |
| 11            | 6             | 0           | -2.003083               | 2.288443  | 0.575979  |
| 12            | 6             | 0           | -2.832820               | 3.307330  | 1.034723  |
| 13            | 6             | 0           | -4.048180               | 3.593748  | 0.402645  |
| 14            | 6             | 0           | -4.414045               | 2.829441  | -0.710949 |
| 15            | 6             | 0           | -3.594327               | 1.807426  | -1.180660 |
| 16            | 1             | 0           | -3.880143               | 1.215725  | -2.047420 |
| 17            | 1             | 0           | -5.354998               | 3.033955  | -1.222084 |
| 18            | 1             | 0           | -4.691990               | 4.390901  | 0.767659  |
| 19            | 1             | 0           | -2.523024               | 3.890602  | 1.901355  |
| 20            | 1             | 0           | -1.054061               | 2.080975  | 1.066619  |
| 21            | 1             | 0           | 2.058334                | 1.231168  | -1.445417 |
| 22            | 1             | 0           | 4.278618                | 2.144630  | -2.044958 |
| 23            | 1             | 0           | 6.013641                | 2.516940  | -0.287124 |
| 24            | 1             | 0           | 5.467835                | 1.957899  | 2.085194  |
| 25            | 1             | 0           | 3.237988                | 1.042509  | 2.677422  |
| 26            | 6             | 0           | -0.467619               | -1.976916 | 0.100397  |
| 27            | 35            | 0           | 0.999747                | -1.992870 | -1.401690 |
| 28            | 6             | 0           | -0.001264               | -2.267509 | 1.397263  |
| 29            | 6             | 0           | -0.858800               | -2.885627 | 2.307538  |
| 30            | 6             | 0           | -2.140392               | -3.285165 | 1.923653  |
| 31            | 6             | 0           | -2.569009               | -3.050702 | 0.610727  |
| 32            | 6             | 0           | -1.732465               | -2.434692 | -0.312245 |
| 33            | 1             | 0           | 0.990177                | -1.944603 | 1.690820  |
| 34            | 1             | 0           | -0.510200               | -3.064528 | 3.322280  |
| 35            | 1             | 0           | -2.798659               | -3.777107 | 2.635129  |
| 36            | 1             | 0           | -3.565583               | -3.356464 | 0.299969  |
| 37            | 1             | 0           | -2.066627               | -2.235756 | -1.322937 |

**PDd**

SCF Done: E(RB+HF-LYP) = -5057.53464023 A.U.

| Center Number | Atomic Number | Atomic Type | Coordinates (Angstroms) |           |           |
|---------------|---------------|-------------|-------------------------|-----------|-----------|
|               |               |             | X                       | Y         | Z         |
| 1             | 6             | 0           | 1.989746                | -1.639846 | 1.536612  |
| 2             | 6             | 0           | 1.796129                | -0.975426 | 0.325072  |
| 3             | 6             | 0           | 2.897180                | -0.604007 | -0.445284 |
| 4             | 6             | 0           | 4.191937                | -0.893780 | -0.000211 |
| 5             | 6             | 0           | 4.389414                | -1.557348 | 1.210864  |
| 6             | 6             | 0           | 3.283153                | -1.928975 | 1.978647  |
| 7             | 29            | 0           | 0.038697                | -0.487046 | -0.195364 |
| 8             | 35            | 0           | -0.163002               | -2.540256 | -1.178500 |
| 9             | 8             | 0           | -1.606869               | 0.120621  | -0.867726 |
| 10            | 6             | 0           | -2.710491               | 0.127178  | -0.148690 |
| 11            | 6             | 0           | -3.852193               | 0.813461  | -0.637707 |
| 12            | 6             | 0           | -5.047648               | 0.826981  | 0.072521  |
| 13            | 6             | 0           | -5.166299               | 0.166597  | 1.300828  |

|    |   |   |           |           |           |
|----|---|---|-----------|-----------|-----------|
| 14 | 6 | 0 | -4.050583 | -0.511922 | 1.799183  |
| 15 | 6 | 0 | -2.847966 | -0.537355 | 1.097518  |
| 16 | 8 | 0 | 0.263357  | 1.017076  | 0.846225  |
| 17 | 6 | 0 | 0.719444  | 2.135228  | 0.296593  |
| 18 | 6 | 0 | 0.827081  | 2.346659  | -1.097770 |
| 19 | 6 | 0 | 1.307944  | 3.553686  | -1.600988 |
| 20 | 6 | 0 | 1.688121  | 4.592187  | -0.747512 |
| 21 | 6 | 0 | 1.577681  | 4.396550  | 0.633568  |
| 22 | 6 | 0 | 1.109649  | 3.193397  | 1.150978  |
| 23 | 1 | 0 | 1.028469  | 3.037207  | 2.223044  |
| 24 | 1 | 0 | 1.866819  | 5.192047  | 1.319042  |
| 25 | 1 | 0 | 2.059950  | 5.532355  | -1.147675 |
| 26 | 1 | 0 | 1.376593  | 3.684756  | -2.679759 |
| 27 | 1 | 0 | 0.499743  | 1.563260  | -1.775315 |
| 28 | 1 | 0 | -1.996893 | -1.081404 | 1.501350  |
| 29 | 1 | 0 | -4.115840 | -1.034592 | 2.752844  |
| 30 | 1 | 0 | -6.102321 | 0.182092  | 1.854368  |
| 31 | 1 | 0 | -5.902236 | 1.364373  | -0.337977 |
| 32 | 1 | 0 | -3.761337 | 1.328087  | -1.590744 |
| 33 | 1 | 0 | 2.761796  | -0.084921 | -1.390291 |
| 34 | 1 | 0 | 5.045708  | -0.597409 | -0.606809 |
| 35 | 1 | 0 | 5.396468  | -1.784143 | 1.554380  |
| 36 | 1 | 0 | 3.424518  | -2.448623 | 2.924646  |
| 37 | 1 | 0 | 1.135705  | -1.940971 | 2.138634  |

**E**  
 SCF Done: E(RB+HF-LYP) = -2211.72108209 A.U.

| Center Number | Atomic Number | Atomic Type | Coordinates (Angstroms) |           |          |
|---------------|---------------|-------------|-------------------------|-----------|----------|
|               |               |             | X                       | Y         | Z        |
| 1             | 6             | 0           | 2.816433                | 0.433495  | 0.000000 |
| 2             | 6             | 0           | 2.293915                | 1.690709  | 0.000000 |
| 3             | 6             | 0           | 0.875050                | 1.898862  | 0.000000 |
| 4             | 6             | 0           | 0.000000                | 0.788098  | 0.000000 |
| 5             | 6             | 0           | 0.558587                | -0.555993 | 0.000000 |
| 6             | 6             | 0           | 1.963205                | -0.719161 | 0.000000 |
| 7             | 6             | 0           | 0.300030                | 3.192454  | 0.000000 |
| 8             | 6             | 0           | -1.071528               | 3.333458  | 0.000000 |
| 9             | 6             | 0           | -1.873087               | 2.179700  | 0.000000 |
| 10            | 7             | 0           | -1.367321               | 0.947144  | 0.000000 |
| 11            | 6             | 0           | 2.474522                | -2.039264 | 0.000000 |
| 12            | 6             | 0           | 1.607083                | -3.110923 | 0.000000 |
| 13            | 6             | 0           | 0.223854                | -2.865362 | 0.000000 |
| 14            | 7             | 0           | -0.293152               | -1.637447 | 0.000000 |
| 15            | 29            | 0           | -1.989843               | -0.826980 | 0.000000 |
| 16            | 1             | 0           | -2.955113               | 2.255981  | 0.000000 |
| 17            | 1             | 0           | -1.541421               | 4.310707  | 0.000000 |
| 18            | 1             | 0           | 0.948603                | 4.063811  | 0.000000 |
| 19            | 1             | 0           | -0.485296               | -3.686155 | 0.000000 |
| 20            | 1             | 0           | 1.968392                | -4.133295 | 0.000000 |
| 21            | 1             | 0           | 3.549659                | -2.194223 | 0.000000 |
| 22            | 1             | 0           | 2.944107                | 2.560271  | 0.000000 |
| 23            | 1             | 0           | 3.891447                | 0.280993  | 0.000000 |

**CPe**  
 SCF Done: E(RB+HF-LYP) = -5015.14926088 A.U.

| Center Number | Atomic Number | Atomic Type | Coordinates (Angstroms) |           |           |
|---------------|---------------|-------------|-------------------------|-----------|-----------|
|               |               |             | X                       | Y         | Z         |
| 1             | 6             | 0           | -3.076815               | 1.182414  | 0.601514  |
| 2             | 6             | 0           | -2.560018               | -0.023739 | 0.072558  |
| 3             | 6             | 0           | -2.289241               | -1.149297 | 0.905819  |
| 4             | 6             | 0           | -2.458863               | -0.977392 | 2.306371  |
| 5             | 6             | 0           | -2.882091               | 0.231176  | 2.829328  |
| 6             | 6             | 0           | -3.207246               | 1.305575  | 1.973210  |
| 7             | 29            | 0           | -0.610552               | -0.321873 | 0.055844  |
| 8             | 35            | 0           | -2.602581               | -0.319515 | -1.845289 |
| 9             | 7             | 0           | 0.619999                | 1.258234  | -0.053358 |
| 10            | 6             | 0           | 1.914145                | 0.832921  | -0.023976 |
| 11            | 6             | 0           | 3.014122                | 1.719901  | -0.062463 |
| 12            | 6             | 0           | 2.726359                | 3.102205  | -0.139823 |
| 13            | 6             | 0           | 1.411462                | 3.523911  | -0.170945 |
| 14            | 6             | 0           | 0.383864                | 2.565203  | -0.125948 |
| 15            | 6             | 0           | 4.346328                | 1.185753  | -0.023001 |
| 16            | 6             | 0           | 4.563245                | -0.158447 | 0.049766  |
| 17            | 6             | 0           | 3.466580                | -1.084356 | 0.089225  |
| 18            | 6             | 0           | 2.143510                | -0.587496 | 0.057252  |
| 19            | 7             | 0           | 1.048982                | -1.400177 | 0.089482  |
| 20            | 6             | 0           | 1.237683                | -2.717068 | 0.149043  |
| 21            | 6             | 0           | 2.514839                | -3.302448 | 0.183899  |
| 22            | 6             | 0           | 3.629554                | -2.487027 | 0.156409  |
| 23            | 1             | 0           | 0.344455                | -3.333767 | 0.169079  |
| 24            | 1             | 0           | 2.606576                | -4.381989 | 0.231133  |

|    |   |   |           |           |           |
|----|---|---|-----------|-----------|-----------|
| 25 | 1 | 0 | 4.629219  | -2.911507 | 0.182759  |
| 26 | 1 | 0 | -0.659775 | 2.864126  | -0.142500 |
| 27 | 1 | 0 | 1.158621  | 4.576885  | -0.229903 |
| 28 | 1 | 0 | 3.541165  | 3.820017  | -0.173397 |
| 29 | 1 | 0 | 5.574935  | -0.552158 | 0.077105  |
| 30 | 1 | 0 | 5.183206  | 1.877141  | -0.053367 |
| 31 | 1 | 0 | -2.279351 | -2.154977 | 0.494438  |
| 32 | 1 | 0 | -2.291448 | -1.827160 | 2.961849  |
| 33 | 1 | 0 | -3.013448 | 0.340965  | 3.901162  |
| 34 | 1 | 0 | -3.587584 | 2.232832  | 2.391376  |
| 35 | 1 | 0 | -3.357586 | 1.989817  | -0.066404 |

**TSe**

SCF Done: E(RB+HF-LYP) = -5015.14312082 A.U.

| Center Number | Atomic Number | Atomic Type | Coordinates (Angstroms) |           |           |
|---------------|---------------|-------------|-------------------------|-----------|-----------|
|               |               |             | X                       | Y         | Z         |
| 1             | 7             | 0           | 0.578007                | 1.218293  | -0.403454 |
| 2             | 6             | 0           | 1.885768                | 0.922320  | -0.164732 |
| 3             | 6             | 0           | 2.916161                | 1.886825  | -0.243974 |
| 4             | 6             | 0           | 2.539475                | 3.207117  | -0.581377 |
| 5             | 6             | 0           | 1.209100                | 3.498159  | -0.813163 |
| 6             | 6             | 0           | 0.254696                | 2.471112  | -0.710275 |
| 7             | 6             | 0           | 4.270558                | 1.486849  | 0.016170  |
| 8             | 6             | 0           | 4.574711                | 0.196043  | 0.334138  |
| 9             | 6             | 0           | 3.549798                | -0.805684 | 0.421718  |
| 10            | 6             | 0           | 2.207387                | -0.440261 | 0.171826  |
| 11            | 7             | 0           | 1.177175                | -1.327352 | 0.237764  |
| 12            | 6             | 0           | 1.444368                | -2.595744 | 0.541120  |
| 13            | 6             | 0           | 2.747170                | -3.052620 | 0.805828  |
| 14            | 6             | 0           | 3.799337                | -2.158889 | 0.746880  |
| 15            | 29            | 0           | -0.574101               | -0.423494 | -0.195786 |
| 16            | 1             | 0           | 0.596945                | -3.274308 | 0.574223  |
| 17            | 1             | 0           | 2.907898                | -4.096722 | 1.050892  |
| 18            | 1             | 0           | 4.816247                | -2.485016 | 0.946518  |
| 19            | 1             | 0           | -0.800820               | 2.667683  | -0.872991 |
| 20            | 1             | 0           | 0.889092                | 4.501452  | -1.072236 |
| 21            | 1             | 0           | 3.298519                | 3.980949  | -0.654396 |
| 22            | 1             | 0           | 5.602799                | -0.095457 | 0.527318  |
| 23            | 1             | 0           | 5.053465                | 2.236703  | -0.047368 |
| 24            | 6             | 0           | -2.396427               | 0.104664  | 0.170680  |
| 25            | 35            | 0           | -2.222318               | -1.750872 | -1.029922 |
| 26            | 6             | 0           | -2.511838               | -0.101503 | 1.551670  |
| 27            | 6             | 0           | -3.172272               | 0.868433  | 2.314851  |
| 28            | 6             | 0           | -3.772161               | 1.963407  | 1.694523  |
| 29            | 6             | 0           | -3.715601               | 2.102402  | 0.301475  |
| 30            | 6             | 0           | -3.050556               | 1.158192  | -0.478516 |
| 31            | 1             | 0           | -2.099514               | -0.987378 | 2.024355  |
| 32            | 1             | 0           | -3.242929               | 0.738842  | 3.390743  |
| 33            | 1             | 0           | -4.311123               | 2.694516  | 2.288884  |
| 34            | 1             | 0           | -4.211287               | 2.938372  | -0.183825 |
| 35            | 1             | 0           | -3.033565               | 1.240700  | -1.560271 |

**PDe**

SCF Done: E(RB+HF-LYP) = -5015.15201249 A.U.

| Center Number | Atomic Number | Atomic Type | Coordinates (Angstroms) |           |           |
|---------------|---------------|-------------|-------------------------|-----------|-----------|
|               |               |             | X                       | Y         | Z         |
| 1             | 6             | 0           | -2.872361               | 0.616773  | -1.211537 |
| 2             | 6             | 0           | -2.290373               | 0.268893  | 0.002227  |
| 3             | 6             | 0           | -2.845117               | 0.612542  | 1.230067  |
| 4             | 6             | 0           | -3.989956               | 1.419062  | 1.233725  |
| 5             | 6             | 0           | -4.571202               | 1.823936  | 0.030489  |
| 6             | 6             | 0           | -4.016972               | 1.423475  | -1.186829 |
| 7             | 29            | 0           | -0.541595               | -0.468403 | -0.012614 |
| 8             | 35            | 0           | -1.656787               | -2.391808 | -0.008784 |
| 9             | 7             | 0           | 0.391290                | 1.271109  | -0.012983 |
| 10            | 6             | 0           | 1.748683                | 1.126292  | -0.004734 |
| 11            | 6             | 0           | 2.639121                | 2.221713  | -0.002780 |
| 12            | 6             | 0           | 2.066271                | 3.514350  | -0.010437 |
| 13            | 6             | 0           | 0.691168                | 3.649203  | -0.019235 |
| 14            | 6             | 0           | -0.120055               | 2.501312  | -0.020051 |
| 15            | 6             | 0           | 4.052078                | 1.962461  | 0.006497  |
| 16            | 6             | 0           | 4.536811                | 0.686205  | 0.013141  |
| 17            | 6             | 0           | 3.649435                | -0.442756 | 0.010940  |
| 18            | 6             | 0           | 2.258231                | -0.209569 | 0.001965  |
| 19            | 7             | 0           | 1.336219                | -1.207869 | -0.000884 |
| 20            | 6             | 0           | 1.753901                | -2.469718 | 0.004540  |
| 21            | 6             | 0           | 3.121551                | -2.801796 | 0.013738  |
| 22            | 6             | 0           | 4.067912                | -1.794576 | 0.016961  |
| 23            | 1             | 0           | 0.975605                | -3.226888 | 0.001682  |
| 24            | 1             | 0           | 3.413310                | -3.846201 | 0.018055  |
| 25            | 1             | 0           | 5.128397                | -2.030316 | 0.023970  |

|    |   |   |           |          |           |
|----|---|---|-----------|----------|-----------|
| 26 | 1 | 0 | -1.201151 | 2.576726 | -0.026574 |
| 27 | 1 | 0 | 0.221921  | 4.626686 | -0.025423 |
| 28 | 1 | 0 | 2.709611  | 4.389751 | -0.009451 |
| 29 | 1 | 0 | 5.607554  | 0.506037 | 0.020088  |
| 30 | 1 | 0 | 4.733051  | 2.808166 | 0.008079  |
| 31 | 1 | 0 | -2.416603 | 0.268143 | 2.166448  |
| 32 | 1 | 0 | -4.431634 | 1.709000 | 2.182877  |
| 33 | 1 | 0 | -5.469253 | 2.434104 | 0.041608  |
| 34 | 1 | 0 | -4.479751 | 1.716623 | -2.124873 |
| 35 | 1 | 0 | -2.464588 | 0.275654 | -2.158318 |

**TS<sub>met1</sub>**

SCF Done: E(RB+HF-LYP) = -5322.16600479 A.U.

| Center Number | Atomic Number | Atomic Type | Coordinates (Angstroms) |           |           |
|---------------|---------------|-------------|-------------------------|-----------|-----------|
|               |               |             | X                       | Y         | Z         |
| 1             | 6             | 0           | 1.104068                | 2.175943  | -1.067800 |
| 2             | 6             | 0           | 1.623137                | 1.646856  | 0.128016  |
| 3             | 6             | 0           | 2.408448                | 2.475756  | 0.949400  |
| 4             | 6             | 0           | 2.650961                | 3.798838  | 0.586251  |
| 5             | 6             | 0           | 2.117515                | 4.322792  | -0.595275 |
| 6             | 6             | 0           | 1.342705                | 3.502855  | -1.419878 |
| 7             | 8             | 0           | 1.385529                | 0.364961  | 0.472901  |
| 8             | 29            | 0           | -0.254957               | -0.628018 | 0.121359  |
| 9             | 7             | 0           | -1.703890               | -0.426480 | -1.244434 |
| 10            | 6             | 0           | -2.901944               | -0.131184 | -0.660912 |
| 11            | 6             | 0           | -4.097098               | 0.064587  | -1.394957 |
| 12            | 6             | 0           | -4.032926               | -0.096423 | -2.794470 |
| 13            | 6             | 0           | -2.822745               | -0.430187 | -3.379166 |
| 14            | 6             | 0           | -1.685969               | -0.581478 | -2.571091 |
| 15            | 6             | 0           | -5.294943               | 0.420993  | -0.686385 |
| 16            | 6             | 0           | -5.295397               | 0.571783  | 0.668676  |
| 17            | 6             | 0           | -4.103437               | 0.357343  | 1.441164  |
| 18            | 6             | 0           | -2.911325               | -0.007591 | 0.769825  |
| 19            | 6             | 0           | -4.045094               | 0.479619  | 2.844962  |
| 20            | 6             | 0           | -2.847024               | 0.233054  | 3.493888  |
| 21            | 6             | 0           | -1.723349               | -0.147625 | 2.744402  |
| 22            | 7             | 0           | -1.741438               | -0.278005 | 1.416318  |
| 23            | 1             | 0           | -0.776358               | -0.365403 | 3.229332  |
| 24            | 1             | 0           | -2.766075               | 0.316046  | 4.572957  |
| 25            | 1             | 0           | -4.935480               | 0.761321  | 3.400719  |
| 26            | 1             | 0           | -0.721336               | -0.827266 | -3.006222 |
| 27            | 1             | 0           | -2.735756               | -0.563276 | -4.452747 |
| 28            | 1             | 0           | -4.926632               | 0.043149  | -3.396752 |
| 29            | 1             | 0           | -6.207012               | 0.850215  | 1.190864  |
| 30            | 1             | 0           | -6.206382               | 0.576553  | -1.257607 |
| 31            | 1             | 0           | 2.817122                | 2.060329  | 1.865147  |
| 32            | 1             | 0           | 3.258572                | 4.428737  | 1.232008  |
| 33            | 1             | 0           | 2.304762                | 5.357349  | -0.870098 |
| 34            | 1             | 0           | 0.926717                | 3.897792  | -2.344112 |
| 35            | 1             | 0           | 0.513824                | 1.519797  | -1.701894 |
| 36            | 6             | 0           | 2.934161                | -0.802769 | 0.110167  |
| 37            | 35            | 0           | 1.274727                | -2.397827 | -0.084957 |
| 38            | 6             | 0           | 3.678192                | -0.950977 | 1.273780  |
| 39            | 6             | 0           | 5.062790                | -0.778669 | 1.190865  |
| 40            | 6             | 0           | 5.677792                | -0.471745 | -0.025873 |
| 41            | 6             | 0           | 4.892232                | -0.327788 | -1.171244 |
| 42            | 6             | 0           | 3.504898                | -0.493109 | -1.116578 |
| 43            | 1             | 0           | 3.193867                | -1.192423 | 2.213129  |
| 44            | 1             | 0           | 5.660186                | -0.890796 | 2.092967  |
| 45            | 1             | 0           | 6.755002                | -0.344540 | -0.079563 |
| 46            | 1             | 0           | 5.354227                | -0.087271 | -2.126019 |
| 47            | 1             | 0           | 2.888214                | -0.377397 | -2.001024 |

**TS<sub>met2</sub>**

SCF Done: E(RB+HF-LYP) = -5057.45969073 A.U.

| Center Number | Atomic Number | Atomic Type | Coordinates (Angstroms) |           |           |
|---------------|---------------|-------------|-------------------------|-----------|-----------|
|               |               |             | X                       | Y         | Z         |
| 1             | 6             | 0           | 2.279832                | 2.197595  | 0.809825  |
| 2             | 6             | 0           | 1.134091                | 1.645286  | 0.203820  |
| 3             | 6             | 0           | 0.287906                | 2.493511  | -0.540152 |
| 4             | 6             | 0           | 0.574181                | 3.849907  | -0.658714 |
| 5             | 6             | 0           | 1.717451                | 4.394855  | -0.064812 |
| 6             | 6             | 0           | 2.563291                | 3.555635  | 0.664894  |
| 7             | 8             | 0           | 0.815550                | 0.342637  | 0.316531  |
| 8             | 29            | 0           | -0.805585               | -0.405090 | -0.442047 |
| 9             | 8             | 0           | -2.412641               | 0.359054  | -0.955495 |
| 10            | 6             | 0           | -3.501939               | 0.165022  | -0.249863 |
| 11            | 6             | 0           | -4.720715               | 0.801472  | -0.604119 |
| 12            | 6             | 0           | -5.882374               | 0.600456  | 0.134839  |
| 13            | 6             | 0           | -5.894029               | -0.240022 | 1.255009  |
| 14            | 6             | 0           | -4.702999               | -0.878637 | 1.618643  |



|    |    |   |           |           |           |
|----|----|---|-----------|-----------|-----------|
| 15 | 6  | 0 | -3.535004 | -0.684112 | 0.889328  |
| 16 | 35 | 0 | 0.562159  | -2.238899 | -0.705894 |
| 17 | 1  | 0 | 2.935075  | 1.556355  | 1.389241  |
| 18 | 1  | 0 | 3.455034  | 3.963684  | 1.138355  |
| 19 | 1  | 0 | 1.941935  | 5.454346  | -0.165058 |
| 20 | 1  | 0 | -0.102216 | 4.487024  | -1.225656 |
| 21 | 1  | 0 | -0.603405 | 2.056855  | -0.981729 |
| 22 | 1  | 0 | -2.606355 | -1.183889 | 1.160954  |
| 23 | 1  | 0 | -4.684467 | -1.539183 | 2.485183  |
| 24 | 1  | 0 | -6.805574 | -0.391491 | 1.828689  |
| 25 | 1  | 0 | -6.798540 | 1.107936  | -0.167679 |
| 26 | 1  | 0 | -4.717142 | 1.455041  | -1.473424 |
| 27 | 6  | 0 | 2.309268  | -0.947633 | 0.140165  |
| 28 | 6  | 0 | 2.731675  | -1.360015 | 1.402527  |
| 29 | 6  | 0 | 4.100192  | -1.379312 | 1.679677  |
| 30 | 6  | 0 | 5.034992  | -0.997070 | 0.710993  |
| 31 | 6  | 0 | 4.581273  | -0.588283 | -0.545676 |
| 32 | 6  | 0 | 3.215519  | -0.559708 | -0.842401 |
| 33 | 1  | 0 | 2.002872  | -1.647282 | 2.153386  |
| 34 | 1  | 0 | 4.435413  | -1.696150 | 2.666148  |
| 35 | 1  | 0 | 6.098810  | -1.016935 | 0.933671  |
| 36 | 1  | 0 | 5.293706  | -0.286657 | -1.311782 |
| 37 | 1  | 0 | 2.862322  | -0.237794 | -1.816844 |

**(phen)Cu(II)(OPh)<sup>+</sup>**

SCF Done: E(UB+HF-LYP) = -2518.64747048 A.U.

| Center Number | Atomic Number | Atomic Type | Coordinates (Angstroms) |           |           |
|---------------|---------------|-------------|-------------------------|-----------|-----------|
|               |               |             | X                       | Y         | Z         |
| 1             | 29            | 0           | -0.530416               | -0.000825 | -0.405350 |
| 2             | 7             | 0           | 0.894663                | -1.331436 | -0.176951 |
| 3             | 6             | 0           | 2.096842                | -0.717510 | 0.010060  |
| 4             | 6             | 0           | 2.096302                | 0.717992  | 0.009985  |
| 5             | 7             | 0           | 0.893634                | 1.331001  | -0.176950 |
| 6             | 6             | 0           | 0.852472                | 2.662651  | -0.187987 |
| 7             | 6             | 0           | 2.002753                | 3.452578  | -0.012381 |
| 8             | 6             | 0           | 3.225741                | 2.837904  | 0.179824  |
| 9             | 6             | 0           | 3.303016                | 1.425567  | 0.195377  |
| 10            | 6             | 0           | 4.518582                | 0.683605  | 0.383974  |
| 11            | 6             | 0           | 4.519087                | -0.681277 | 0.384109  |
| 12            | 6             | 0           | 3.304072                | -1.424169 | 0.195618  |
| 13            | 6             | 0           | 3.227826                | -2.836561 | 0.180310  |
| 14            | 6             | 0           | 0.854466                | -2.663125 | -0.187765 |
| 15            | 1             | 0           | -0.118423               | -3.118758 | -0.342389 |
| 16            | 1             | 0           | 1.916352                | -4.532738 | -0.030037 |
| 17            | 1             | 0           | 4.129525                | -3.426527 | 0.318402  |
| 18            | 1             | 0           | 5.445375                | -1.229618 | 0.526900  |
| 19            | 1             | 0           | 5.444467                | 1.232659  | 0.526645  |
| 20            | 1             | 0           | 4.127021                | 3.428548  | 0.317750  |
| 21            | 1             | 0           | 1.912994                | 4.533075  | -0.030737 |
| 22            | 1             | 0           | -0.120778               | 3.117557  | -0.342490 |
| 23            | 8             | 0           | -2.228608               | -0.000934 | -0.898052 |
| 24            | 6             | 0           | -3.410558               | -0.000517 | -0.298079 |
| 25            | 6             | 0           | -4.579831               | -0.000224 | -1.094787 |
| 26            | 6             | 0           | -5.829514               | 0.000203  | -0.490013 |
| 27            | 6             | 0           | -5.940378               | 0.000358  | 0.906821  |
| 28            | 6             | 0           | -4.785910               | 0.000071  | 1.703942  |
| 29            | 6             | 0           | -3.531684               | -0.000382 | 1.112345  |
| 30            | 1             | 0           | -4.470043               | -0.000352 | -2.174600 |
| 31            | 1             | 0           | -6.725229               | 0.000419  | -1.103980 |
| 32            | 1             | 0           | -6.920440               | 0.000693  | 1.373806  |
| 33            | 1             | 0           | -4.874249               | 0.000177  | 2.786408  |
| 34            | 1             | 0           | -2.625222               | -0.000639 | 1.714372  |
| 35            | 6             | 0           | 2.005301                | -3.452171 | -0.011881 |

**PhBr<sup>-</sup>**

SCF Done: E(UB+HF-LYP) = -2803.34183894 A.U.

| Center Number | Atomic Number | Atomic Type | Coordinates (Angstroms) |           |           |
|---------------|---------------|-------------|-------------------------|-----------|-----------|
|               |               |             | X                       | Y         | Z         |
| 1             | 35            | 0           | 2.271476                | 0.000039  | -0.003051 |
| 2             | 6             | 0           | -0.484807               | 0.001299  | 0.016798  |
| 3             | 6             | 0           | -1.176310               | 1.207229  | 0.009684  |
| 4             | 6             | 0           | -2.578618               | 1.209171  | -0.003480 |
| 5             | 6             | 0           | -3.280652               | -0.001271 | -0.009944 |
| 6             | 6             | 0           | -2.576395               | -1.210398 | -0.003415 |
| 7             | 6             | 0           | -1.174087               | -1.205903 | 0.009654  |
| 8             | 1             | 0           | -0.629184               | 2.150453  | 0.014395  |
| 9             | 1             | 0           | -3.128039               | 2.152545  | -0.008771 |
| 10            | 1             | 0           | -4.369988               | -0.002286 | -0.020326 |
| 11            | 1             | 0           | -3.124098               | -2.154772 | -0.008696 |
| 12            | 1             | 0           | -0.625154               | -2.148063 | 0.014390  |



**CPb(triplet)**

SCF Done: E(UB+HF-LYP) = -5322.18088269 A.U.

| Center Number | Atomic Number | Atomic Type | Coordinates (Angstroms) |           |           |
|---------------|---------------|-------------|-------------------------|-----------|-----------|
|               |               |             | X                       | Y         | Z         |
| 1             | 6             | 0           | -3.085014               | -1.560204 | 1.140217  |
| 2             | 6             | 0           | -2.904237               | -1.651859 | -0.261303 |
| 3             | 6             | 0           | -4.059793               | -1.680846 | -1.073634 |
| 4             | 6             | 0           | -5.327874               | -1.609602 | -0.507739 |
| 5             | 6             | 0           | -5.492820               | -1.496230 | 0.878643  |
| 6             | 6             | 0           | -4.362178               | -1.471401 | 1.695706  |
| 7             | 8             | 0           | -1.693321               | -1.726029 | -0.809241 |
| 8             | 29            | 0           | -0.341925               | -0.792279 | 0.029871  |
| 9             | 7             | 0           | 1.035906                | -0.347443 | 1.307378  |
| 10            | 6             | 0           | 2.290075                | -0.723117 | 0.832894  |
| 11            | 6             | 0           | 3.483410                | -0.518144 | 1.581815  |
| 12            | 6             | 0           | 3.379647                | 0.077690  | 2.840760  |
| 13            | 6             | 0           | 2.096398                | 0.438989  | 3.323745  |
| 14            | 6             | 0           | 0.979438                | 0.215174  | 2.544433  |
| 15            | 6             | 0           | 2.329539                | -1.344809 | -0.421037 |
| 16            | 6             | 0           | 3.557418                | -1.779617 | -1.005110 |
| 17            | 6             | 0           | 4.758232                | -1.547121 | -0.249697 |
| 18            | 6             | 0           | 4.720712                | -0.949797 | 0.976770  |
| 19            | 6             | 0           | 3.495772                | -2.407382 | -2.250203 |
| 20            | 6             | 0           | 2.250608                | -2.596528 | -2.874607 |
| 21            | 6             | 0           | 1.093105                | -2.143294 | -2.243362 |
| 22            | 7             | 0           | 1.117105                | -1.519990 | -1.060218 |
| 23            | 6             | 0           | -0.548031               | 2.754202  | -0.436696 |
| 24            | 6             | 0           | 0.570573                | 3.153790  | 0.288422  |
| 25            | 6             | 0           | 1.391027                | 4.145698  | -0.254303 |
| 26            | 6             | 0           | 1.087164                | 4.719659  | -1.489850 |
| 27            | 6             | 0           | -0.041936               | 4.300582  | -2.195877 |
| 28            | 6             | 0           | -0.872151               | 3.307276  | -1.672683 |
| 29            | 35            | 0           | -1.717159               | 1.391107  | 0.279149  |
| 30            | 1             | 0           | 0.107059                | -2.281994 | -2.676697 |
| 31            | 1             | 0           | 2.175987                | -3.095328 | -3.834661 |
| 32            | 1             | 0           | 4.409301                | -2.755141 | -2.726060 |
| 33            | 1             | 0           | -0.012806               | 0.479795  | 2.899844  |
| 34            | 1             | 0           | 1.979112                | 0.887658  | 4.304745  |
| 35            | 1             | 0           | 4.268048                | 0.248871  | 3.441555  |
| 36            | 1             | 0           | 5.707356                | -1.865206 | -0.674380 |
| 37            | 1             | 0           | 5.641547                | -0.792162 | 1.533190  |
| 38            | 1             | 0           | -1.749270               | 2.970643  | -2.214656 |
| 39            | 1             | 0           | -0.281736               | 4.742056  | -3.159021 |
| 40            | 1             | 0           | 1.730241                | 5.491249  | -1.903133 |
| 41            | 1             | 0           | 2.270637                | 4.466123  | 0.296644  |
| 42            | 1             | 0           | 0.807437                | 2.701111  | 1.244527  |
| 43            | 1             | 0           | -3.926604               | -1.756617 | -2.149090 |
| 44            | 1             | 0           | -6.202244               | -1.635641 | -1.154420 |
| 45            | 1             | 0           | -6.487186               | -1.437331 | 1.311886  |
| 46            | 1             | 0           | -4.471501               | -1.401554 | 2.775632  |
| 47            | 1             | 0           | -2.208004               | -1.597561 | 1.787611  |

**Cu(II)(OPh)<sub>2</sub>**

SCF Done: E(UB+HF-LYP) = -2254.05058606 A.U.

| Center Number | Atomic Number | Atomic Type | Coordinates (Angstroms) |           |           |
|---------------|---------------|-------------|-------------------------|-----------|-----------|
|               |               |             | X                       | Y         | Z         |
| 1             | 6             | 0           | -2.896142               | 0.926734  | 0.215388  |
| 2             | 6             | 0           | -2.685707               | -0.443652 | -0.051320 |
| 3             | 6             | 0           | -3.800966               | -1.302052 | -0.130609 |
| 4             | 6             | 0           | -5.085150               | -0.796092 | 0.041185  |
| 5             | 6             | 0           | -5.286254               | 0.563920  | 0.302125  |
| 6             | 6             | 0           | -4.182917               | 1.420621  | 0.390720  |
| 7             | 8             | 0           | -1.461714               | -0.953641 | -0.218107 |
| 8             | 29            | 0           | -0.000034               | -0.000325 | -0.263885 |
| 9             | 8             | 0           | 1.461539                | 0.953179  | -0.218709 |
| 10            | 6             | 0           | 2.685642                | 0.443558  | -0.051639 |
| 11            | 6             | 0           | 3.800662                | 1.302286  | -0.130753 |
| 12            | 6             | 0           | 5.084964                | 0.796721  | 0.041327  |
| 13            | 6             | 0           | 5.286424                | -0.563220 | 0.302361  |
| 14            | 6             | 0           | 4.183326                | -1.420250 | 0.390765  |
| 15            | 6             | 0           | 2.896438                | -0.926756 | 0.215154  |
| 16            | 1             | 0           | 2.027660                | -1.578282 | 0.291402  |
| 17            | 1             | 0           | 4.329925                | -2.476858 | 0.598746  |
| 18            | 1             | 0           | 6.291630                | -0.951377 | 0.438207  |
| 19            | 1             | 0           | 5.937811                | 1.467123  | -0.026316 |
| 20            | 1             | 0           | 3.627982                | 2.354945  | -0.332449 |
| 21            | 1             | 0           | -3.628562               | -2.354772 | -0.332223 |
| 22            | 1             | 0           | -5.938186               | -1.466241 | -0.026602 |
| 23            | 1             | 0           | -6.291372               | 0.952383  | 0.437757  |
| 24            | 1             | 0           | -4.329241               | 2.477279  | 0.598642  |
| 25            | 1             | 0           | -2.027180               | 1.577994  | 0.291806  |

CPd(triplet)

SCF Done: E(UB+HF-LYP) = -5057.51176022 A.U.

| Center Number | Atomic Number | Atomic Type | Coordinates (Angstroms) |           |           |
|---------------|---------------|-------------|-------------------------|-----------|-----------|
|               |               |             | X                       | Y         | Z         |
| 1             | 6             | 0           | -2.718422               | -1.567716 | -0.276397 |
| 2             | 6             | 0           | -1.444002               | -1.575964 | 0.292677  |
| 3             | 6             | 0           | -1.190003               | -2.385027 | 1.401871  |
| 4             | 6             | 0           | -2.205150               | -3.183941 | 1.938981  |
| 5             | 6             | 0           | -3.479062               | -3.180542 | 1.364943  |
| 6             | 6             | 0           | -3.734111               | -2.370665 | 0.256438  |
| 7             | 29            | 0           | 0.033432                | -0.477825 | -0.464138 |
| 8             | 35            | 0           | 1.354725                | -2.030004 | -1.593089 |
| 9             | 8             | 0           | 0.974988                | 0.088360  | 1.098329  |
| 10            | 6             | 0           | 2.209968                | 0.540906  | 0.977081  |
| 11            | 6             | 0           | 3.276859                | -0.112754 | 1.642280  |
| 12            | 6             | 0           | 4.564395                | 0.410067  | 1.605625  |
| 13            | 6             | 0           | 4.837844                | 1.580949  | 0.888176  |
| 14            | 6             | 0           | 3.798213                | 2.224927  | 0.206179  |
| 15            | 6             | 0           | 2.502578                | 1.722888  | 0.249208  |
| 16            | 8             | 0           | -0.771687               | 1.067910  | -1.133093 |
| 17            | 6             | 0           | -1.490311               | 2.047454  | -0.615276 |
| 18            | 6             | 0           | -2.033980               | 2.003661  | 0.692077  |
| 19            | 6             | 0           | -2.789523               | 3.065386  | 1.181125  |
| 20            | 6             | 0           | -3.040201               | 4.198145  | 0.399282  |
| 21            | 6             | 0           | -2.510149               | 4.252158  | -0.894012 |
| 22            | 6             | 0           | -1.746014               | 3.202718  | -1.395290 |
| 23            | 1             | 0           | -1.330163               | 3.238972  | -2.398807 |
| 24            | 1             | 0           | -2.692657               | 5.124941  | -1.519660 |
| 25            | 1             | 0           | -3.634207               | 5.021133  | 0.789814  |
| 26            | 1             | 0           | -3.192403               | 3.005477  | 2.190986  |
| 27            | 1             | 0           | -1.848171               | 1.125353  | 1.300960  |
| 28            | 1             | 0           | 1.687436                | 2.212769  | -0.275278 |
| 29            | 1             | 0           | 4.002873                | 3.131394  | -0.360579 |
| 30            | 1             | 0           | 5.848758                | 1.980452  | 0.853370  |
| 31            | 1             | 0           | 5.368289                | -0.102532 | 2.131277  |
| 32            | 1             | 0           | 3.050450                | -1.028842 | 2.180253  |
| 33            | 1             | 0           | -0.199014               | -2.389559 | 1.849287  |
| 34            | 1             | 0           | -1.999607               | -3.811001 | 2.805549  |
| 35            | 1             | 0           | -4.268734               | -3.803556 | 1.780909  |
| 36            | 1             | 0           | -4.726092               | -2.357527 | -0.193013 |
| 37            | 1             | 0           | -2.931619               | -0.926480 | -1.128665 |

(phen)Cu(II)(OPh)(Br)

SCF Done: E(UB+HF-LYP) = -5090.60827696 A.U.

| Center Number | Atomic Number | Atomic Type | Coordinates (Angstroms) |           |           |
|---------------|---------------|-------------|-------------------------|-----------|-----------|
|               |               |             | X                       | Y         | Z         |
| 1             | 7             | 0           | -1.029261               | 1.373714  | -0.337542 |
| 2             | 6             | 0           | -2.283839               | 0.975963  | -0.024964 |
| 3             | 6             | 0           | -3.392036               | 1.851213  | 0.001033  |
| 4             | 6             | 0           | -3.134467               | 3.207753  | -0.301135 |
| 5             | 6             | 0           | -1.842720               | 3.608362  | -0.590728 |
| 6             | 6             | 0           | -0.805059               | 2.655881  | -0.594594 |
| 7             | 6             | 0           | -4.684201               | 1.315331  | 0.329062  |
| 8             | 6             | 0           | -4.847858               | -0.009949 | 0.613266  |
| 9             | 6             | 0           | -3.733607               | -0.917761 | 0.606416  |
| 10            | 6             | 0           | -2.452340               | -0.415816 | 0.287560  |
| 11            | 6             | 0           | -3.820457               | -2.296695 | 0.903066  |
| 12            | 6             | 0           | -2.677580               | -3.073624 | 0.863721  |
| 13            | 6             | 0           | -1.444652               | -2.480305 | 0.532484  |
| 14            | 7             | 0           | -1.333535               | -1.182534 | 0.269307  |
| 15            | 29            | 0           | 0.357591                | -0.144988 | -0.238359 |
| 16            | 35            | 0           | 1.439064                | -1.897374 | -1.294631 |
| 17            | 8             | 0           | 1.636222                | 1.121108  | 0.169540  |
| 18            | 6             | 0           | 2.919490                | 0.909991  | 0.462333  |
| 19            | 6             | 0           | 3.313006                | 0.038731  | 1.500753  |
| 20            | 6             | 0           | 4.655851                | -0.113983 | 1.831259  |
| 21            | 6             | 0           | 5.643308                | 0.601625  | 1.146507  |
| 22            | 6             | 0           | 5.265904                | 1.468680  | 0.116824  |
| 23            | 6             | 0           | 3.925106                | 1.620312  | -0.225756 |
| 24            | 1             | 0           | 0.230671                | 2.915147  | -0.789430 |
| 25            | 1             | 0           | -1.616117               | 4.645137  | -0.815969 |
| 26            | 1             | 0           | -3.951317               | 3.924809  | -0.297850 |
| 27            | 1             | 0           | -0.525745               | -3.053464 | 0.455320  |
| 28            | 1             | 0           | -2.714808               | -4.135913 | 1.080634  |
| 29            | 1             | 0           | -4.782627               | -2.733974 | 1.156855  |
| 30            | 1             | 0           | -5.536836               | 1.988657  | 0.344897  |
| 31            | 1             | 0           | -5.831987               | -0.400581 | 0.857183  |
| 32            | 1             | 0           | 3.623958                | 2.286383  | -1.029955 |
| 33            | 1             | 0           | 6.024623                | 2.027130  | -0.427271 |
| 34            | 1             | 0           | 6.690988                | 0.481725  | 1.408921  |

|    |   |   |          |           |          |
|----|---|---|----------|-----------|----------|
| 35 | 1 | 0 | 4.936219 | -0.795068 | 2.631826 |
| 36 | 1 | 0 | 2.542316 | -0.518626 | 2.028034 |

**Ph<sup>-</sup>**

SCF Done: E(UB+HF-LYP) = -231.561280804 A.U.

| Center Number | Atomic Number | Atomic Type | Coordinates (Angstroms) |           |           |
|---------------|---------------|-------------|-------------------------|-----------|-----------|
|               |               |             | X                       | Y         | Z         |
| 1             | 6             | 0           | 0.000000                | 0.000000  | 1.400175  |
| 2             | 6             | 0           | 0.000000                | 1.226379  | 0.771790  |
| 3             | 6             | 0           | 0.000000                | 1.214189  | -0.632604 |
| 4             | 6             | 0           | 0.000000                | 0.000000  | -1.324732 |
| 5             | 6             | 0           | 0.000000                | -1.214189 | -0.632604 |
| 6             | 6             | 0           | 0.000000                | -1.226379 | 0.771790  |
| 7             | 1             | 0           | 0.000000                | 2.162893  | 1.323295  |
| 8             | 1             | 0           | 0.000000                | 2.154667  | -1.179088 |
| 9             | 1             | 0           | 0.000000                | 0.000000  | -2.411295 |
| 10            | 1             | 0           | 0.000000                | -2.154667 | -1.179088 |
| 11            | 1             | 0           | 0.000000                | -2.162893 | 1.323295  |

**Cu(II)(OPh)<sub>2</sub>(Br)<sup>-</sup>**

SCF Done: E(UB+HF-LYP) = -4825.91844730 A.U.

| Center Number | Atomic Number | Atomic Type | Coordinates (Angstroms) |           |           |
|---------------|---------------|-------------|-------------------------|-----------|-----------|
|               |               |             | X                       | Y         | Z         |
| 1             | 6             | 0           | 3.755973                | -0.392335 | 1.049556  |
| 2             | 6             | 0           | 2.561438                | -0.131802 | 0.337705  |
| 3             | 6             | 0           | 2.585691                | 0.895346  | -0.634855 |
| 4             | 6             | 0           | 3.754595                | 1.613705  | -0.875385 |
| 5             | 6             | 0           | 4.933232                | 1.343193  | -0.172390 |
| 6             | 6             | 0           | 4.917352                | 0.331737  | 0.792862  |
| 7             | 8             | 0           | 1.484795                | -0.858740 | 0.604705  |
| 8             | 29            | 0           | -0.183797               | -0.971080 | -0.132359 |
| 9             | 8             | 0           | -0.615320               | 0.641973  | -0.941434 |
| 10            | 6             | 0           | -1.478748               | 1.466136  | -0.368171 |
| 11            | 6             | 0           | -1.699726               | 2.745215  | -0.933464 |
| 12            | 6             | 0           | -2.602799               | 3.637289  | -0.363812 |
| 13            | 6             | 0           | -3.321495               | 3.298921  | 0.788034  |
| 14            | 6             | 0           | -3.115196               | 2.038489  | 1.355706  |
| 15            | 6             | 0           | -2.216327               | 1.135379  | 0.794322  |
| 16            | 35            | 0           | -1.634927               | -2.739107 | -0.175461 |
| 17            | 1             | 0           | 3.740059                | -1.179294 | 1.799307  |
| 18            | 1             | 0           | 5.821955                | 0.103628  | 1.355704  |
| 19            | 1             | 0           | 5.840985                | 1.908962  | -0.369737 |
| 20            | 1             | 0           | 3.742889                | 2.402015  | -1.627159 |
| 21            | 1             | 0           | 1.665898                | 1.119960  | -1.166087 |
| 22            | 1             | 0           | -2.082537               | 0.148721  | 1.231134  |
| 23            | 1             | 0           | -3.665199               | 1.748685  | 2.249811  |
| 24            | 1             | 0           | -4.023758               | 4.000575  | 1.231846  |
| 25            | 1             | 0           | -2.746909               | 4.613795  | -0.824853 |
| 26            | 1             | 0           | -1.140554               | 3.009537  | -1.827245 |

**Cs<sub>2</sub>CO<sub>3</sub>**

SCF Done: E(RB+HF-LYP) = -303.615196532 A.U.

| Center Number | Atomic Number | Atomic Type | Coordinates (Angstroms) |           |           |
|---------------|---------------|-------------|-------------------------|-----------|-----------|
|               |               |             | X                       | Y         | Z         |
| 1             | 6             | 0           | -0.054078               | 0.006224  | 0.006627  |
| 2             | 8             | 0           | -0.310993               | -0.036086 | 1.318560  |
| 3             | 8             | 0           | 1.171023                | 0.030760  | -0.395123 |
| 4             | 55            | 0           | 2.469161                | -0.012354 | 2.073990  |
| 5             | 8             | 0           | -1.036537               | 0.021270  | -0.828196 |
| 6             | 55            | 0           | -3.167655               | -0.088783 | 0.972538  |

**CsHCO<sub>3</sub>**

SCF Done: E(RB+HF-LYP) = -284.324205756 A.U.

| Center Number | Atomic Number | Atomic Type | Coordinates (Angstroms) |           |           |
|---------------|---------------|-------------|-------------------------|-----------|-----------|
|               |               |             | X                       | Y         | Z         |
| 1             | 6             | 0           | 2.215030                | -0.179121 | 0.000478  |
| 2             | 8             | 0           | 1.519359                | 1.131070  | 0.002472  |
| 3             | 8             | 0           | 3.440876                | -0.092562 | -0.003062 |
| 4             | 1             | 0           | 2.262792                | 1.753888  | -0.000734 |
| 5             | 8             | 0           | 1.404014                | -1.131537 | 0.002520  |
| 6             | 55            | 0           | -1.208490               | 0.001183  | -0.000320 |

**CsBr**

SCF Done: E(RB+HF-LYP) = -2591.65907613 A.U.

| Center Number | Atomic Number | Atomic Type | Coordinates (Angstroms) |          |           |
|---------------|---------------|-------------|-------------------------|----------|-----------|
|               |               |             | X                       | Y        | Z         |
| 1             | 55            | 0           | 0.000000                | 0.000000 | 1.273312  |
| 2             | 35            | 0           | 0.000000                | 0.000000 | -2.000919 |

**(phen)Cu(I)(O-Ph-p-Me)**

SCF Done: E(RB+HF-LYP) = -2558.14958460 A.U.

| Center Number | Atomic Number | Atomic Type | Coordinates (Angstroms) |           |           |
|---------------|---------------|-------------|-------------------------|-----------|-----------|
|               |               |             | X                       | Y         | Z         |
| 1             | 6             | 0           | -1.998595               | 3.482181  | -0.271337 |
| 2             | 6             | 0           | -3.253163               | 2.994785  | 0.049407  |
| 3             | 6             | 0           | -3.435976               | 1.600589  | 0.171873  |
| 4             | 6             | 0           | -2.314885               | 0.767514  | -0.052907 |
| 5             | 7             | 0           | -1.068949               | 1.258347  | -0.353720 |
| 6             | 6             | 0           | -0.935787               | 2.588811  | -0.459180 |
| 7             | 6             | 0           | -4.692871               | 0.997016  | 0.519619  |
| 8             | 6             | 0           | -4.819890               | -0.354569 | 0.646100  |
| 9             | 6             | 0           | -3.701090               | -1.224942 | 0.422443  |
| 10            | 6             | 0           | -2.452217               | -0.661674 | 0.062195  |
| 11            | 6             | 0           | -3.761247               | -2.631486 | 0.535014  |
| 12            | 6             | 0           | -2.624922               | -3.382531 | 0.296490  |
| 13            | 6             | 0           | -1.433693               | -2.723411 | -0.064630 |
| 14            | 7             | 0           | -1.346996               | -1.405813 | -0.186105 |
| 15            | 29            | 0           | 0.262181                | -0.016150 | -0.573643 |
| 16            | 8             | 0           | 1.737758                | -1.046690 | -0.666587 |
| 17            | 6             | 0           | 2.940048                | -0.611731 | -0.299455 |
| 18            | 6             | 0           | 4.091845                | -1.384220 | -0.563983 |
| 19            | 6             | 0           | 5.352683                | -0.948789 | -0.167463 |
| 20            | 6             | 0           | 5.538946                | 0.264863  | 0.512068  |
| 21            | 6             | 0           | 4.395148                | 1.027178  | 0.784337  |
| 22            | 6             | 0           | 3.128667                | 0.604478  | 0.392132  |
| 23            | 1             | 0           | 0.059827                | 2.948728  | -0.692232 |
| 24            | 1             | 0           | -1.818417               | 4.547452  | -0.371660 |
| 25            | 1             | 0           | -4.091660               | 3.666432  | 0.211506  |
| 26            | 1             | 0           | -5.546303               | 1.648174  | 0.688530  |
| 27            | 1             | 0           | -5.775933               | -0.794714 | 0.917270  |
| 28            | 1             | 0           | -4.698781               | -3.108923 | 0.808553  |
| 29            | 1             | 0           | -2.640183               | -4.464892 | 0.375215  |
| 30            | 1             | 0           | -0.518523               | -3.275232 | -0.264062 |
| 31            | 1             | 0           | 3.969281                | -2.329070 | -1.087132 |
| 32            | 1             | 0           | 6.219742                | -1.569920 | -0.390266 |
| 33            | 6             | 0           | 6.917790                | 0.737381  | 0.913494  |
| 34            | 1             | 0           | 4.498897                | 1.970499  | 1.319513  |
| 35            | 1             | 0           | 2.238036                | 1.191957  | 0.612026  |
| 36            | 1             | 0           | 6.863680                | 1.519234  | 1.679807  |
| 37            | 1             | 0           | 7.525937                | -0.081000 | 1.318967  |
| 38            | 1             | 0           | 7.475949                | 1.156756  | 0.063765  |

**(phen)Cu(II)(O-Ph-p-Me)(Br)**

SCF Done: E(UB+HF-LYP) = -5129.92566108 A.U.

| Center Number | Atomic Number | Atomic Type | Coordinates (Angstroms) |           |           |
|---------------|---------------|-------------|-------------------------|-----------|-----------|
|               |               |             | X                       | Y         | Z         |
| 1             | 6             | 0           | 3.659402                | 1.544381  | -0.448905 |
| 2             | 6             | 0           | 2.670965                | 0.861906  | 0.288023  |
| 3             | 6             | 0           | 3.101254                | 0.002009  | 1.320657  |
| 4             | 6             | 0           | 4.454109                | -0.165511 | 1.592445  |
| 5             | 6             | 0           | 5.439318                | 0.514912  | 0.860518  |
| 6             | 6             | 0           | 5.010117                | 1.374243  | -0.160720 |
| 7             | 8             | 0           | 1.379358                | 1.090023  | 0.050894  |
| 8             | 29            | 0           | 0.070160                | -0.161692 | -0.300608 |
| 9             | 35            | 0           | 1.080825                | -1.934132 | -1.393938 |
| 10            | 7             | 0           | -1.301584               | 1.373928  | -0.355819 |
| 11            | 6             | 0           | -2.545384               | 0.995949  | 0.018425  |
| 12            | 6             | 0           | -3.639668               | 1.886407  | 0.087452  |
| 13            | 6             | 0           | -3.378759               | 3.236729  | -0.238517 |
| 14            | 6             | 0           | -2.096667               | 3.617387  | -0.591131 |
| 15            | 6             | 0           | -1.073073               | 2.650853  | -0.634368 |
| 16            | 6             | 0           | -4.922309               | 1.371001  | 0.479427  |
| 17            | 6             | 0           | -5.090394               | 0.050459  | 0.782310  |
| 18            | 6             | 0           | -3.989795               | -0.872525 | 0.732506  |
| 19            | 6             | 0           | -2.717701               | -0.390741 | 0.351519  |
| 20            | 7             | 0           | -1.610958               | -1.172587 | 0.290571  |
| 21            | 6             | 0           | -1.727676               | -2.466710 | 0.568900  |
| 22            | 6             | 0           | -2.952248               | -3.040614 | 0.959923  |
| 23            | 6             | 0           | -4.081622               | -2.247676 | 1.044591  |
| 24            | 1             | 0           | -0.044289               | 2.894882  | -0.879220 |
| 25            | 1             | 0           | -1.867168               | 4.649050  | -0.836114 |
| 26            | 1             | 0           | -4.185196               | 3.964680  | -0.204030 |
| 27            | 1             | 0           | -0.820940               | -3.053165 | 0.455488  |

|    |   |   |           |           |           |
|----|---|---|-----------|-----------|-----------|
| 28 | 1 | 0 | -2.993928 | -4.100624 | 1.187017  |
| 29 | 1 | 0 | -5.037090 | -2.669566 | 1.345425  |
| 30 | 1 | 0 | -5.764259 | 2.056092  | 0.528467  |
| 31 | 1 | 0 | -6.067446 | -0.324710 | 1.074291  |
| 32 | 1 | 0 | 3.339543  | 2.209785  | -1.246446 |
| 33 | 1 | 0 | 5.751055  | 1.917835  | -0.744806 |
| 34 | 6 | 0 | 6.908504  | 0.302753  | 1.142823  |
| 35 | 1 | 0 | 4.755903  | -0.837427 | 2.394372  |
| 36 | 1 | 0 | 2.349738  | -0.533530 | 1.896095  |
| 37 | 1 | 0 | 7.506244  | 1.166473  | 0.830271  |
| 38 | 1 | 0 | 7.094118  | 0.136282  | 2.210540  |
| 39 | 1 | 0 | 7.302891  | -0.573209 | 0.608438  |

**(phen)Cu(I)(O-Ph-p-OMe)**

SCF Done: E(RB+HF-LYP) = -2633.35171713 A.U.

| Center Number | Atomic Number | Atomic Type | Coordinates (Angstroms) |           |           |
|---------------|---------------|-------------|-------------------------|-----------|-----------|
|               |               |             | X                       | Y         | Z         |
| 1             | 6             | 0           | -2.199212               | 3.508533  | -0.359509 |
| 2             | 6             | 0           | -3.470087               | 3.071400  | -0.029395 |
| 3             | 6             | 0           | -3.696298               | 1.688555  | 0.139154  |
| 4             | 6             | 0           | -2.600570               | 0.813762  | -0.050098 |
| 5             | 7             | 0           | -1.338889               | 1.254957  | -0.365210 |
| 6             | 6             | 0           | -1.164475               | 2.577097  | -0.513230 |
| 7             | 6             | 0           | -4.973533               | 1.136280  | 0.498248  |
| 8             | 6             | 0           | -5.144237               | -0.205741 | 0.668019  |
| 9             | 6             | 0           | -4.051917               | -1.117465 | 0.482139  |
| 10            | 6             | 0           | -2.783327               | -0.605240 | 0.114040  |
| 11            | 6             | 0           | -4.156610               | -2.516942 | 0.639996  |
| 12            | 6             | 0           | -3.042642               | -3.310473 | 0.435046  |
| 13            | 6             | 0           | -1.828370               | -2.700552 | 0.064257  |
| 14            | 7             | 0           | -1.699720               | -1.390952 | -0.097929 |
| 15            | 29            | 0           | -0.052744               | -0.067079 | -0.554598 |
| 16            | 8             | 0           | 1.357560                | -1.175554 | -0.682082 |
| 17            | 6             | 0           | 2.608123                | -0.808959 | -0.403416 |
| 18            | 6             | 0           | 3.690673                | -1.652941 | -0.740490 |
| 19            | 6             | 0           | 5.000647                | -1.300109 | -0.443503 |
| 20            | 6             | 0           | 5.287792                | -0.093607 | 0.209402  |
| 21            | 6             | 0           | 4.234331                | 0.755623  | 0.560951  |
| 22            | 6             | 0           | 2.919838                | 0.394668  | 0.256936  |
| 23            | 1             | 0           | -0.158229               | 2.897958  | -0.757043 |
| 24            | 1             | 0           | -1.985629               | 4.563700  | -0.495066 |
| 25            | 1             | 0           | -4.288235               | 3.773630  | 0.104488  |
| 26            | 1             | 0           | -5.807118               | 1.819095  | 0.639048  |
| 27            | 1             | 0           | -6.115616               | -0.606410 | 0.945859  |
| 28            | 1             | 0           | -5.110542               | -2.955934 | 0.921214  |
| 29            | 1             | 0           | -3.092507               | -4.388703 | 0.548584  |
| 30            | 1             | 0           | -0.928879               | -3.285877 | -0.109542 |
| 31            | 1             | 0           | 3.475444                | -2.589964 | -1.247006 |
| 32            | 1             | 0           | 5.828309                | -1.951674 | -0.710803 |
| 33            | 8             | 0           | 6.622432                | 0.157253  | 0.457098  |
| 34            | 1             | 0           | 4.418982                | 1.694358  | 1.073374  |
| 35            | 1             | 0           | 2.087060                | 1.041270  | 0.529513  |
| 36            | 6             | 0           | 6.948404                | 1.364250  | 1.110176  |
| 37            | 1             | 0           | 8.036845                | 1.375325  | 1.207849  |
| 38            | 1             | 0           | 6.631081                | 2.243748  | 0.530358  |
| 39            | 1             | 0           | 6.497751                | 1.424303  | 2.112029  |

**(phen)Cu(II)(O-Ph-p-OMe)(Br)**

SCF Done: E(UB+HF-LYP) = -5205.12914883 A.U.

| Center Number | Atomic Number | Atomic Type | Coordinates (Angstroms) |           |           |
|---------------|---------------|-------------|-------------------------|-----------|-----------|
|               |               |             | X                       | Y         | Z         |
| 1             | 6             | 0           | -3.415353               | 1.361909  | 0.503571  |
| 2             | 6             | 0           | -2.423163               | 0.755997  | -0.287989 |
| 3             | 6             | 0           | -2.851318               | -0.080556 | -1.344531 |
| 4             | 6             | 0           | -4.198047               | -0.294974 | -1.590868 |
| 5             | 6             | 0           | -5.173089               | 0.323748  | -0.793266 |
| 6             | 6             | 0           | -4.773495               | 1.156049  | 0.258583  |
| 7             | 8             | 0           | -1.133971               | 1.022270  | -0.080042 |
| 8             | 29            | 0           | 0.209089                | -0.188514 | 0.291734  |
| 9             | 35            | 0           | -0.747822               | -1.981782 | 1.400587  |
| 10            | 7             | 0           | 1.539923                | 1.383403  | 0.353857  |
| 11            | 6             | 0           | 2.793691                | 1.039794  | -0.020905 |
| 12            | 6             | 0           | 3.864397                | 1.959207  | -0.084603 |
| 13            | 6             | 0           | 3.567780                | 3.301168  | 0.244697  |
| 14            | 6             | 0           | 2.275470                | 3.646928  | 0.596164  |
| 15            | 6             | 0           | 1.278241                | 2.653269  | 0.635648  |
| 16            | 6             | 0           | 5.161570                | 1.479296  | -0.473754 |
| 17            | 6             | 0           | 5.366035                | 0.164355  | -0.778291 |
| 18            | 6             | 0           | 4.290242                | -0.787693 | -0.734585 |
| 19            | 6             | 0           | 3.003846                | -0.340899 | -0.358438 |
| 20            | 7             | 0           | 1.917942                | -1.151886 | -0.305823 |

|    |   |   |           |           |           |
|----|---|---|-----------|-----------|-----------|
| 21 | 6 | 0 | 2.071306  | -2.441968 | -0.585146 |
| 22 | 6 | 0 | 3.312700  | -2.982460 | -0.970491 |
| 23 | 6 | 0 | 4.420692  | -2.159164 | -1.048697 |
| 24 | 1 | 0 | 0.243493  | 2.869992  | 0.881051  |
| 25 | 1 | 0 | 2.018479  | 4.671472  | 0.843858  |
| 26 | 1 | 0 | 4.355042  | 4.049995  | 0.213926  |
| 27 | 1 | 0 | 1.180266  | -3.053142 | -0.478041 |
| 28 | 1 | 0 | 3.383966  | -4.040589 | -1.199102 |
| 29 | 1 | 0 | 5.388606  | -2.554488 | -1.345851 |
| 30 | 1 | 0 | 5.984980  | 2.186880  | -0.518504 |
| 31 | 1 | 0 | 6.353863  | -0.184098 | -1.067207 |
| 32 | 1 | 0 | -3.099688 | 2.000263  | 1.324196  |
| 33 | 1 | 0 | -5.505950 | 1.642008  | 0.894162  |
| 34 | 8 | 0 | -6.477371 | 0.050122  | -1.125488 |
| 35 | 1 | 0 | -4.525966 | -0.940828 | -2.400298 |
| 36 | 1 | 0 | -2.096664 | -0.565654 | -1.958611 |
| 37 | 6 | 0 | -7.495984 | 0.622161  | -0.328807 |
| 38 | 1 | 0 | -8.441712 | 0.271833  | -0.748513 |
| 39 | 1 | 0 | -7.423762 | 0.298124  | 0.718860  |
| 40 | 1 | 0 | -7.472236 | 1.720758  | -0.362518 |

**(phen)Cu(I)(O-Ph-p-F)**

SCF Done: E(RB+HF-LYP) = -2618.06580264 A.U.

| Center Number | Atomic Number | Atomic Type | Coordinates (Angstroms) |           |           |
|---------------|---------------|-------------|-------------------------|-----------|-----------|
|               |               |             | X                       | Y         | Z         |
| 1             | 6             | 0           | -2.020299               | 3.476788  | -0.262191 |
| 2             | 6             | 0           | -3.272390               | 2.974956  | 0.044616  |
| 3             | 6             | 0           | -3.441574               | 1.578463  | 0.161447  |
| 4             | 6             | 0           | -2.309235               | 0.758238  | -0.053563 |
| 5             | 7             | 0           | -1.066047               | 1.263329  | -0.341292 |
| 6             | 6             | 0           | -0.946118               | 2.595148  | -0.442118 |
| 7             | 6             | 0           | -4.695709               | 0.960627  | 0.493561  |
| 8             | 6             | 0           | -4.809835               | -0.392680 | 0.613675  |
| 9             | 6             | 0           | -3.679447               | -1.250369 | 0.399407  |
| 10            | 6             | 0           | -2.432586               | -0.672836 | 0.055768  |
| 11            | 6             | 0           | -3.726135               | -2.658027 | 0.505871  |
| 12            | 6             | 0           | -2.579499               | -3.396195 | 0.277389  |
| 13            | 6             | 0           | -1.390999               | -2.723254 | -0.066997 |
| 14            | 7             | 0           | -1.316668               | -1.404322 | -0.181792 |
| 15            | 29            | 0           | 0.279178                | 0.001265  | -0.551481 |
| 16            | 8             | 0           | 1.763980                | -1.016801 | -0.643311 |
| 17            | 6             | 0           | 2.966511                | -0.581028 | -0.279010 |
| 18            | 6             | 0           | 4.118565                | -1.346844 | -0.564283 |
| 19            | 6             | 0           | 5.386845                | -0.917709 | -0.177124 |
| 20            | 6             | 0           | 5.520859                | 0.284153  | 0.508709  |
| 21            | 6             | 0           | 4.413796                | 1.066183  | 0.816575  |
| 22            | 6             | 0           | 3.150337                | 0.630912  | 0.424967  |
| 23            | 1             | 0           | 0.047364                | 2.966654  | -0.665794 |
| 24            | 1             | 0           | -1.850624               | 4.544156  | -0.358115 |
| 25            | 1             | 0           | -4.119731               | 3.637068  | 0.199738  |
| 26            | 1             | 0           | -5.557742               | 1.602164  | 0.655249  |
| 27            | 1             | 0           | -5.764111               | -0.843873 | 0.872512  |
| 28            | 1             | 0           | -4.661656               | -3.146290 | 0.766799  |
| 29            | 1             | 0           | -2.584324               | -4.478943 | 0.351701  |
| 30            | 1             | 0           | -0.467899               | -3.264742 | -0.257901 |
| 31            | 1             | 0           | 3.994717                | -2.282739 | -1.101657 |
| 32            | 1             | 0           | 6.272936                | -1.504621 | -0.401533 |
| 33            | 9             | 0           | 6.759540                | 0.703050  | 0.887838  |
| 34            | 1             | 0           | 4.549983                | 1.997824  | 1.358403  |
| 35            | 1             | 0           | 2.257696                | 1.211413  | 0.650895  |

**(phen)Cu(II)(O-Ph-p-F)(Br)**

SCF Done: E(UB+HF-LYP) = -5189.84181678 A.U.

| Center Number | Atomic Number | Atomic Type | Coordinates (Angstroms) |           |           |
|---------------|---------------|-------------|-------------------------|-----------|-----------|
|               |               |             | X                       | Y         | Z         |
| 1             | 6             | 0           | 3.663666                | 1.502844  | -0.470378 |
| 2             | 6             | 0           | 2.687628                | 0.850686  | 0.311960  |
| 3             | 6             | 0           | 3.129190                | 0.016590  | 1.361867  |
| 4             | 6             | 0           | 4.485077                | -0.159431 | 1.620957  |
| 5             | 6             | 0           | 5.414799                | 0.508226  | 0.830533  |
| 6             | 6             | 0           | 5.022239                | 1.338553  | -0.213447 |
| 7             | 8             | 0           | 1.392628                | 1.080088  | 0.094431  |
| 8             | 29            | 0           | 0.080607                | -0.164124 | -0.279532 |
| 9             | 35            | 0           | 1.115935                | -1.939083 | -1.342887 |
| 10            | 7             | 0           | -1.282518               | 1.375180  | -0.342820 |
| 11            | 6             | 0           | -2.533532               | 0.999192  | 0.009321  |
| 12            | 6             | 0           | -3.625486               | 1.893173  | 0.066971  |
| 13            | 6             | 0           | -3.354748               | 3.244634  | -0.246248 |
| 14            | 6             | 0           | -2.066140               | 3.622856  | -0.576765 |
| 15            | 6             | 0           | -1.045383               | 2.652974  | -0.610135 |
| 16            | 6             | 0           | -4.915976               | 1.380092  | 0.435482  |

|    |   |   |           |           |           |
|----|---|---|-----------|-----------|-----------|
| 17 | 6 | 0 | -5.093585 | 0.058212  | 0.726916  |
| 18 | 6 | 0 | -3.995766 | -0.868539 | 0.687642  |
| 19 | 6 | 0 | -2.716241 | -0.389021 | 0.329769  |
| 20 | 7 | 0 | -1.611760 | -1.174816 | 0.279348  |
| 21 | 6 | 0 | -1.737421 | -2.470421 | 0.546651  |
| 22 | 6 | 0 | -2.970012 | -3.042307 | 0.915006  |
| 23 | 6 | 0 | -4.097489 | -2.245657 | 0.988183  |
| 24 | 1 | 0 | -0.012300 | 2.895023  | -0.837960 |
| 25 | 1 | 0 | -1.829212 | 4.655159  | -0.811670 |
| 26 | 1 | 0 | -4.158996 | 3.975293  | -0.219517 |
| 27 | 1 | 0 | -0.831207 | -3.059438 | 0.442815  |
| 28 | 1 | 0 | -3.019075 | -4.103754 | 1.133650  |
| 29 | 1 | 0 | -5.059006 | -2.666078 | 1.271202  |
| 30 | 1 | 0 | -5.756023 | 2.068020  | 0.475987  |
| 31 | 1 | 0 | -6.076388 | -0.315205 | 1.001197  |
| 32 | 1 | 0 | 3.329363  | 2.138806  | -1.284972 |
| 33 | 1 | 0 | 5.777921  | 1.838217  | -0.811971 |
| 34 | 9 | 0 | 6.737663  | 0.344878  | 1.085037  |
| 35 | 1 | 0 | 4.830483  | -0.802800 | 2.424466  |
| 36 | 1 | 0 | 2.384136  | -0.498843 | 1.962041  |

**(phen)Cu(I)(O-Ph-p-CF<sub>3</sub>)**

SCF Done: E(RB+HF-LYP) = -2855.87731657 A.U.

| Center Number | Atomic Number | Atomic Type | Coordinates (Angstroms) |           |           |
|---------------|---------------|-------------|-------------------------|-----------|-----------|
|               |               |             | X                       | Y         | Z         |
| 1             | 6             | 0           | -2.743333               | 3.502039  | -0.354731 |
| 2             | 6             | 0           | -3.990860               | 3.072777  | 0.058857  |
| 3             | 6             | 0           | -4.216888               | 1.690879  | 0.240334  |
| 4             | 6             | 0           | -3.142566               | 0.809670  | -0.023449 |
| 5             | 7             | 0           | -1.902918               | 1.243325  | -0.418012 |
| 6             | 6             | 0           | -1.727098               | 2.561906  | -0.577136 |
| 7             | 6             | 0           | -5.471437               | 1.147506  | 0.682228  |
| 8             | 6             | 0           | -5.639640               | -0.193953 | 0.858622  |
| 9             | 6             | 0           | -4.569075               | -1.112935 | 0.596277  |
| 10            | 6             | 0           | -3.324441               | -0.610121 | 0.145725  |
| 11            | 6             | 0           | -4.675280               | -2.512840 | 0.755106  |
| 12            | 6             | 0           | -3.585277               | -3.314203 | 0.471765  |
| 13            | 6             | 0           | -2.393703               | -2.712840 | 0.021009  |
| 14            | 7             | 0           | -2.264478               | -1.403477 | -0.143801 |
| 15            | 29            | 0           | -0.643063               | -0.096009 | -0.696690 |
| 16            | 8             | 0           | 0.795031                | -1.172625 | -0.930741 |
| 17            | 6             | 0           | 2.017953                | -0.796441 | -0.604470 |
| 18            | 6             | 0           | 3.131522                | -1.597227 | -0.953854 |
| 19            | 6             | 0           | 4.420558                | -1.220569 | -0.604758 |
| 20            | 6             | 0           | 4.655480                | -0.035232 | 0.106481  |
| 21            | 6             | 0           | 3.564906                | 0.767564  | 0.465737  |
| 22            | 6             | 0           | 2.275837                | 0.394978  | 0.117494  |
| 23            | 1             | 0           | -0.735812               | 2.875517  | -0.883946 |
| 24            | 1             | 0           | -2.531535               | 4.555763  | -0.502745 |
| 25            | 1             | 0           | -4.792960               | 3.780741  | 0.248355  |
| 26            | 1             | 0           | -6.288683               | 1.835570  | 0.880611  |
| 27            | 1             | 0           | -6.592895               | -0.589056 | 1.199616  |
| 28            | 1             | 0           | -5.611648               | -2.945050 | 1.098587  |
| 29            | 1             | 0           | -3.636196               | -4.392441 | 0.583983  |
| 30            | 1             | 0           | -1.514813               | -3.306820 | -0.216537 |
| 31            | 1             | 0           | 2.952140                | -2.511901 | -1.511575 |
| 32            | 1             | 0           | 5.261071                | -1.845662 | -0.893002 |
| 33            | 6             | 0           | 6.038326                | 0.326179  | 0.534676  |
| 34            | 1             | 0           | 3.734146                | 1.689094  | 1.015267  |
| 35            | 1             | 0           | 1.414773                | 1.006361  | 0.382175  |
| 36            | 9             | 0           | 6.193962                | 1.664465  | 0.700905  |
| 37            | 9             | 0           | 6.390944                | -0.240829 | 1.722057  |
| 38            | 9             | 0           | 6.976521                | -0.075703 | -0.360033 |

**(phen)Cu(II)(O-Ph-p-CF<sub>3</sub>)(Br)**

SCF Done: E(UB+HF-LYP) = -5427.65077861 A.U.

| Center Number | Atomic Number | Atomic Type | Coordinates (Angstroms) |           |           |
|---------------|---------------|-------------|-------------------------|-----------|-----------|
|               |               |             | X                       | Y         | Z         |
| 1             | 6             | 0           | -2.935758               | 1.460906  | 0.844326  |
| 2             | 6             | 0           | -1.951741               | 0.788702  | 0.087297  |
| 3             | 6             | 0           | -2.386222               | -0.098582 | -0.922990 |
| 4             | 6             | 0           | -3.737596               | -0.300015 | -1.163836 |
| 5             | 6             | 0           | -4.701342               | 0.382071  | -0.410343 |
| 6             | 6             | 0           | -4.287365               | 1.264881  | 0.594380  |
| 7             | 8             | 0           | -0.666158               | 1.045302  | 0.296393  |
| 8             | 29            | 0           | 0.707204                | -0.187390 | 0.441301  |
| 9             | 35            | 0           | -0.193147               | -2.010957 | 1.538788  |
| 10            | 7             | 0           | 2.035307                | 1.378486  | 0.386851  |
| 11            | 6             | 0           | 3.249049                | 1.033628  | -0.101531 |
| 12            | 6             | 0           | 4.313215                | 1.949283  | -0.253261 |
| 13            | 6             | 0           | 4.054027                | 3.288156  | 0.119013  |

|    |   |   |           |           |           |
|----|---|---|-----------|-----------|-----------|
| 14 | 6 | 0 | 2.801343  | 3.634368  | 0.591933  |
| 15 | 6 | 0 | 1.805309  | 2.645229  | 0.708183  |
| 16 | 6 | 0 | 5.564812  | 1.468867  | -0.770127 |
| 17 | 6 | 0 | 5.730845  | 0.157791  | -1.113010 |
| 18 | 6 | 0 | 4.658972  | -0.790226 | -0.978721 |
| 19 | 6 | 0 | 3.419299  | -0.343260 | -0.471065 |
| 20 | 7 | 0 | 2.340398  | -1.151459 | -0.317402 |
| 21 | 6 | 0 | 2.455579  | -2.437847 | -0.631147 |
| 22 | 6 | 0 | 3.648739  | -2.976688 | -1.148767 |
| 23 | 6 | 0 | 4.748548  | -2.157723 | -1.324118 |
| 24 | 1 | 0 | 0.797942  | 2.862310  | 1.048570  |
| 25 | 1 | 0 | 2.573281  | 4.656476  | 0.874935  |
| 26 | 1 | 0 | 4.838286  | 4.034772  | 0.025207  |
| 27 | 1 | 0 | 1.576483  | -3.046560 | -0.442494 |
| 28 | 1 | 0 | 3.690177  | -4.031341 | -1.399212 |
| 29 | 1 | 0 | 5.679451  | -2.553480 | -1.721724 |
| 30 | 1 | 0 | 6.384526  | 2.172941  | -0.883171 |
| 31 | 1 | 0 | 6.683910  | -0.190424 | -1.501395 |
| 32 | 1 | 0 | -2.607851 | 2.133442  | 1.631583  |
| 33 | 1 | 0 | -5.030453 | 1.787305  | 1.189304  |
| 34 | 6 | 0 | -6.155098 | 0.219124  | -0.721455 |
| 35 | 1 | 0 | -4.052836 | -0.993231 | -1.937789 |
| 36 | 1 | 0 | -1.637806 | -0.633507 | -1.501892 |
| 37 | 9 | 0 | -6.938189 | 0.406919  | 0.368672  |
| 38 | 9 | 0 | -6.589750 | 1.108347  | -1.655574 |
| 39 | 9 | 0 | -6.440086 | -1.011319 | -1.213441 |

---



3. **Table SI.** Electronic Energies, Zero-Point Vibrational Energies, Thermal Corrections to Enthalpies and Gibbs Free Energies and Solvation Energies in Toluene.

| Complex                                   | SP (a.u.)    | ZPE (a.u.) | $\Delta H$ (a.u.) | $\Delta G$ (a.u.) | Gsol (kcal/mol) |
|-------------------------------------------|--------------|------------|-------------------|-------------------|-----------------|
| PhBr                                      | -2805.853714 | 0.090832   | 0.097468          | 0.059962          | -0.98           |
| PhOH                                      | -307.558441  | 0.104812   | 0.11125           | 0.075845          | -2.43           |
| Ph <sub>2</sub> O                         | -538.653097  | 0.185647   | 0.196575          | 0.148291          | -0.9            |
| Cs <sub>2</sub> CO <sub>3</sub>           | -303.741772  | 0.015306   | 0.023545          | -0.022107         | -9.83           |
| CsHCO <sub>3</sub>                        | -284.438582  | 0.026995   | 0.033574          | -0.005203         | -7.56           |
| CsBr                                      | -2594.112899 | 0.000315   | 0.004284          | -0.026242         | -7.55           |
| phen                                      | -571.747801  | 0.170961   | 0.181059          | 0.1363            | -3.4            |
| <i>oxidative addition</i>                 |              |            |                   |                   |                 |
| <b>A</b>                                  | -3343.354674 | 0.173268   | 0.187492          | 0.129347          | -3.83           |
| CPa                                       | -6149.190652 | 0.265368   | 0.286697          | 0.213415          | -0.1            |
| TSa                                       | -6149.183047 | 0.264484   | 0.285615          | 0.211479          | -0.23           |
| PDA                                       | -6149.181123 | 0.265418   | 0.286948          | 0.212512          | 0.8             |
| <b>B</b>                                  | -1076.110541 | 0.266723   | 0.285236          | 0.217949          | -3.43           |
| CPb                                       | -3881.961068 | 0.358114   | 0.384481          | 0.295817          | 1.7             |
| TSb                                       | -3881.939728 | 0.357531   | 0.383219          | 0.298824          | 1.25            |
| PDb                                       | -3881.948034 | 0.359031   | 0.384897          | 0.300641          | 2.76            |
| TSrd                                      | -3881.936094 | 0.358306   | 0.383658          | 0.30128           | 1.83            |
| PDrd                                      | -3882.000485 | 0.359577   | 0.385783          | 0.297493          | 2.77            |
| <b>C</b>                                  | -1340.765207 | 0.347203   | 0.369429          | 0.295893          | -13.5           |
| <b>D</b>                                  | -811.395956  | 0.18727    | 0.201627          | 0.143447          | -21.7           |
| CPd                                       | -3617.221226 | 0.277597   | 0.30012           | 0.220047          | -16.44          |
| TSd                                       | -3617.214808 | 0.277338   | 0.29914           | 0.221704          | -16.59          |
| PDd                                       | -3617.228831 | 0.278755   | 0.300619          | 0.223003          | -15.77          |
| <b>E</b>                                  | -768.923874  | 0.173571   | 0.185251          | 0.136546          | -19.89          |
| CPe                                       | -3574.811281 | 0.265521   | 0.284593          | 0.216816          | -15.92          |
| TSe                                       | -3574.798473 | 0.265222   | 0.283736          | 0.218079          | -15.78          |
| PDe                                       | -3574.800305 | 0.266276   | 0.285207          | 0.21825           | -16.93          |
| <i>Sigma-bond metathesis</i>              |              |            |                   |                   |                 |
| TS <sub>met1</sub>                        | -3881.919834 | 0.356861   | 0.382494          | 0.29768           | 2.9             |
| TS <sub>met2</sub>                        | -3617.192035 | 0.276969   | 0.298646          | 0.222426          | -16.90          |
| <i>Single-electron transfer mechanism</i> |              |            |                   |                   |                 |
| PhBr <sup>-</sup>                         | -2805.867543 | 0.087071   | 0.09493           | 0.050833          | -30.12          |
| (phen)Cu(II)(OPh) <sup>+</sup>            | -1075.906193 | 0.268468   | 0.286745          | 0.219359          | -16.87          |
| Cu(II)(OPh) <sub>2</sub>                  | -811.279652  | 0.188558   | 0.202897          | 0.143199          | 0.32            |
| CPb(triplet)                              | -3881.917691 | 0.357013   | 0.383149          | 0.296041          | 0.02            |
| CPd(triplet)                              | -3617.209507 | 0.277072   | 0.299813          | 0.217427          | -14.76          |

| <i>Halogen atom transfer mechanism</i>             |              |          |          |          |        |
|----------------------------------------------------|--------------|----------|----------|----------|--------|
| Ph <sup>•</sup>                                    | -231.622251  | 0.087625 | 0.092938 | 0.060236 | -0.92  |
| (phen)Cu(II)(OPh)(Br)                              | -3650.297662 | 0.268864 | 0.289203 | 0.216933 | -2.18  |
| Cu(II)(OPh) <sub>2</sub> (Br) <sup>-</sup>         | -3385.576998 | 0.188461 | 0.205083 | 0.139145 | -18.37 |
| <i>Substituent effect for (phen)Cu(OAr)</i>        |              |          |          |          |        |
| (phen)Cu(I)(O-Ph- <i>p</i> -Me)                    | -1115.437182 | 0.294281 | 0.314674 | 0.242613 | -2.81  |
| (phen)Cu(II)(O-Ph- <i>p</i> -Me)(Br)               | -3689.624445 | 0.296347 | 0.318607 | 0.24118  | -2.12  |
| (phen)Cu(I)(O-Ph- <i>p</i> -OMe)                   | -1190.663666 | 0.299403 | 0.320542 | 0.246892 | -3.45  |
| (phen)Cu(II)(O-Ph- <i>p</i> -OMe)(Br)              | -3764.852387 | 0.301511 | 0.324495 | 0.245848 | -2.6   |
| (phen)Cu(I)(O-Ph- <i>p</i> -F)                     | -1175.380076 | 0.258543 | 0.277915 | 0.208462 | -2.97  |
| (phen)Cu(II)(O-Ph- <i>p</i> -F)(Br)                | -3749.566709 | 0.260656 | 0.281851 | 0.207315 | -2.27  |
| (phen)Cu(I)(O-Ph- <i>p</i> -CF <sub>3</sub> )      | -1413.269349 | 0.271659 | 0.293816 | 0.217034 | -2.02  |
| (phen)Cu(II)(O-Ph- <i>p</i> -CF <sub>3</sub> )(Br) | -3987.452394 | 0.273814 | 0.297764 | 0.215804 | -1.63  |

Note: SP: Single point electronic energy; ZPE: Zero-point vibrational energy;  
ΔH: Thermal correction to enthalpy; ΔG: Thermal correction to Gibbs free energy;  
Gsol: Solvation energy in toluene.
